# Supplementary material for: Ethnoveterinary use of plants and its implication for sustainable livestock management in Nepal
Source: Frontiers journal article supplement (doi:10.3389/fvets.2022.930533), 2022-09-09
Supplement: Table_1.pdf [file Table_1.pdf]

**Supplementary File: Ethnoveterinary uses of plants in Nepal**

| SN | Scientific name<br>(synonyms with asterisk)                                     | Habit   | Family        | Local name                                                  | Parts used            | Use                                                                                                                                                                                                                                                                                                                                                                                |
|----|---------------------------------------------------------------------------------|---------|---------------|-------------------------------------------------------------|-----------------------|------------------------------------------------------------------------------------------------------------------------------------------------------------------------------------------------------------------------------------------------------------------------------------------------------------------------------------------------------------------------------------|
| 1  | <i>Abelmoschus esculentus</i><br>(L.) Moench                                    | Herb    | Malvaceae     | Bhindi (Nepali)                                             | Roots                 | Crushed and fed to cure urinary related problems (26), juice is given to relieve blocked urination (29).                                                                                                                                                                                                                                                                           |
| 2  | <i>Abelmoschus manihot</i> (L.)<br>Medik.                                       | Herb    | Malvaceae     | Som raja (Nepali)                                           | Roots                 | Paste used to treat bone dislocation (29).                                                                                                                                                                                                                                                                                                                                         |
| 3  | <i>Abrus precatorius</i> L.                                                     | Climber | Fabaceae      |                                                             | Seeds                 | Fed for placental retention with quicker parturition (27).                                                                                                                                                                                                                                                                                                                         |
| 4  | <i>Achyranthes aspera</i> L.                                                    | Herb    | Amaranthaceae | Apamarga,<br>Datium, Chir-<br>chiri, Ulata kara<br>(Nepali) | Whole<br>plant, roots | Plant used as veterinary medicine (39). Whole plant and roots used to accelerate the expulsion of placenta (72,109); used for placental retention with quicker parturition (27). Whole plant is fed as a feed to cure endoparasite (26). Root piece is tied around the neck of the cattle to make it easy in delivery (30,31). Root juice stimulates lactation in buffaloes (104). |
| 5  | <i>Acmella calva</i> (DC.) R.<br>K. Jansen<br><br>* <i>Spilanthes calva</i> DC. | Herb    | Asteraceae    |                                                             | Whole<br>plant        | Plant paste is applied as an antidote to snake bite (31).                                                                                                                                                                                                                                                                                                                          |
| 6  | <i>Aconitum gammiei</i> Stapf                                                   | Herb    | Ranunculaceae |                                                             | Rhizome               | Used as antipoisoning (122).                                                                                                                                                                                                                                                                                                                                                       |
| 7  | <i>Aconitum heterophyllum</i><br>Wall. ex Royle                                 | Herb    | Ranunculaceae | Atish, bish<br>(Nepali)                                     | Roots/tuber           | Whole plant is poisonous to cattle (119).                                                                                                                                                                                                                                                                                                                                          |

|    |                                                    |      |             |                                                                                                                                                                                                            |                       |                                                                                                                                                                                                                                              |
|----|----------------------------------------------------|------|-------------|------------------------------------------------------------------------------------------------------------------------------------------------------------------------------------------------------------|-----------------------|----------------------------------------------------------------------------------------------------------------------------------------------------------------------------------------------------------------------------------------------|
| 8  | <i>Acorus calamus</i> L.                           | Herb | Acoraceae   | Bojho (Nepali); Seda, Sete (Tamang); Sutak, Uragandha (Sanskrit); Katara (Tharu); Charila, Chota (Gurung); Chhurcha, Syueda (Sherpa); Shu-dag (Tibetan); Bojha (Satar); Bach (Hindi); Sweet flag (English) | Rootstock, rhizome    | Paste used to remove lice from the body of animals (22,26). Rhizome used in indigestion (40,27), treat external parasite and cough (23). Paste of this plant with <i>Zingiber officinale</i> and <i>Piper nigrum</i> is given in fever (27). |
| 9  | <i>Adiantum venustum</i> D. Don                    | Fern | Pteridaceae | Sinke (Nepali), Bhasipsip (Tamang)                                                                                                                                                                         | Leaves, rhizome       | Juice used externally in cuts and septic wounds particularly for yak and nak (4).                                                                                                                                                            |
| 10 | <i>Adina cordifolia</i> (Roxb.) Brandis            | Tree | Rubiaceae   | Karma (Nepali)                                                                                                                                                                                             | Leaves                | Young leaves are poisonous to cattle (70).                                                                                                                                                                                                   |
| 11 | <i>Aegle marmelos</i> (L.) Corrêa                  | Tree | Rutaceae    | Bel (Nepali)                                                                                                                                                                                               | Leaves, fruits        | Fruit is crushed and the paste given to treat fever (26). Fresh leaves are given to the cattles to control diarrhea and intestinal worms. Leaf decoction is used to treat wounds (30).                                                       |
| 12 | <i>Aeschynomene indica</i> L.                      | Herb | Fabaceae    |                                                                                                                                                                                                            | Whole plant           | Used as veterinary medicine (39).                                                                                                                                                                                                            |
| 13 | <i>Aesculus indica</i> (Colebr. ex Cambess.) Hook. | Tree | Sapindaceae | Panger, Karu (Nepali)                                                                                                                                                                                      | Seeds, fruits, Leaves | Eases urination of livestock (34). Cotyledons are fed to cattle as an anthelmintic medicine (71). Fresh leaves are fed to animals as anthelmintic (28).                                                                                      |

|    |                                                                              |       |                |                                            |                   |                                                                                                                                                                                                                          |
|----|------------------------------------------------------------------------------|-------|----------------|--------------------------------------------|-------------------|--------------------------------------------------------------------------------------------------------------------------------------------------------------------------------------------------------------------------|
|    |                                                                              |       |                |                                            |                   | Pounded seeds given to treat dysentery (29).                                                                                                                                                                             |
| 14 | <i>Agave cantala</i> var. <i>cantala</i><br><br>* <i>Agave cantula</i> Roxb. | Shrub | Agavaceae      | Ketuki, Rambans, Hattibar (Nepali)         | Leaves            | Paste used in worms of livestock (120). Juice extracted from boiled leaf is given orally to cure fever, grounded to obtain juice and fed for any urinary related problem (26). Juice rubbed locally to treat boils (29). |
| 15 | <i>Albizia chinensis</i> (Osbeck) Merr.                                      | Tree  | Fabaceae       |                                            | Leaves and Shoots | Poisonous to cattle (29).                                                                                                                                                                                                |
| 16 | <i>Albizia julibrissin</i> Durazz.                                           | Tree  | Fabaceae       | Siris (Nepali)                             | Whole plant       | Poisonous to cattle (72).                                                                                                                                                                                                |
| 17 | <i>Albizia procera</i> (Roxb.) Benth.                                        | Tree  | Fabaceae       | Jukret (Nepali)                            | Bark              | Dried bark is crushed to make powder, and drenched with water to cure bone related problems (26).                                                                                                                        |
| 18 | <i>Ageratum conyzoides</i> L.                                                | Herb  | Asteraceae     | Bhera jhar (Nepali)                        | Leaves            | Paste used to treat dislocated bones (29).                                                                                                                                                                               |
| 19 | <i>Alocasia indica</i> (Lour.) Spach                                         | Herb  | Araceae        |                                            | Young stem        | Roasted and fed as aphrodisiac (27).                                                                                                                                                                                     |
| 20 | <i>Aloe vera</i> (L.) Burm.f.                                                | Herb  | Asphodelaceae  | Ghyu kumari (Nepali)                       | Leaves, Jel       | Jelly portion of leaf is rubbed in burn area and cure mastitis (26). Leaves used in veterinary medicine (113).                                                                                                           |
| 21 | <i>Allium cepa</i> L.                                                        | Herb  | Amaryllidaceae | Pyaj (Nepali)                              | Bulbs             | Used in indigestion/anorexia (23) and constipation (27).                                                                                                                                                                 |
| 22 | <i>Allium sativum</i> L.                                                     | Herb  | Amaryllidaceae | Lasun (Nepali), No (Magar), Nasun (Tharu), | Bulbs             | Grounded and mixed with dried human placenta (Nâbi) and given to cattle to cure poison (73). Used in indigestion/anorexia (23). Paste with <i>Semecarpus anacardium</i> is used to treat tail cut (27). Mixed with       |

|    |                                                              |         |               |                                           |                  |                                                                                                                                                                                                                                                                                                                                                                                                                                                                                                                                                                                                                                                                                                                                                                   |
|----|--------------------------------------------------------------|---------|---------------|-------------------------------------------|------------------|-------------------------------------------------------------------------------------------------------------------------------------------------------------------------------------------------------------------------------------------------------------------------------------------------------------------------------------------------------------------------------------------------------------------------------------------------------------------------------------------------------------------------------------------------------------------------------------------------------------------------------------------------------------------------------------------------------------------------------------------------------------------|
|    |                                                              |         |               | Garlic (English),<br>Rosun (Sanskrit)     |                  | <i>Mentha arvensis</i> and given to animal to cure diarrhea (26).                                                                                                                                                                                                                                                                                                                                                                                                                                                                                                                                                                                                                                                                                                 |
| 23 | <i>Alstonia scholaris</i> (L) R. Br.                         | Tree    | Apocynaceae   | Chhatiwan (Nepali)                        | Bark, Seeds, Sap | Bark powder mixed with some grain flour is considered a nutritious feed for cattle (70). Bark powder is a feed supplement to increase sterility to ox (74). Mixture prepared with other species is given to the animal in diarrhea and dysentery (41). Bark powder is given as tonic, cause sterility effect on female cattle (69). Bark used as tonic (42), paste given in fever (27). Bark paste mixed with flour is given to eat cattle as tonic to increase weight (112). Juice with other ingredients is used to treat diarrhea (29). Bark decoction is given to cattles to reduce fever (30). Juice is given in diarrhea and dysentery, used to increase lactation (68). Seed powder mixed with corn flour is given to cattle for strength and vigour (31). |
| 24 | <i>Amaranthus spinosus</i> L.                                | Herb    | Amaranthaceae |                                           | Roots            | Juice given to animals in urine trouble (100).                                                                                                                                                                                                                                                                                                                                                                                                                                                                                                                                                                                                                                                                                                                    |
| 25 | <i>Amaranthus viridis</i> L.                                 | Herb    | Amaranthaceae | Lude (Nepali),<br>Thadiya generi (Bantar) | Aerial parts     | Given to increase lactation (40,27).                                                                                                                                                                                                                                                                                                                                                                                                                                                                                                                                                                                                                                                                                                                              |
| 26 | <i>Ampelocissus divaricata</i> (Wall. ex M.A.Lawson) Planch. | Climber | Vitaceae      | Purreni (Nepali)                          | Sap              | One end of fresh-cut stem is brought near to eye and watery like substance oozing out from stem is let go into eye by blowing air (26).                                                                                                                                                                                                                                                                                                                                                                                                                                                                                                                                                                                                                           |

|    |                                                                                                     |      |               |                                            |              |                                                                                                                                                                                                 |
|----|-----------------------------------------------------------------------------------------------------|------|---------------|--------------------------------------------|--------------|-------------------------------------------------------------------------------------------------------------------------------------------------------------------------------------------------|
| 27 | <i>Anaphalis triplinervis</i> (Sims) C. B. Clarke                                                   | Herb | Asteraceae    | Ekle ghans (Nepali)                        | Flower       | Paste is applied as an antiseptic on wounds in cattle (2).                                                                                                                                      |
| 28 | <i>Anemonastrum obtusilobum</i> subsp. <i>obtusilobum</i><br><br>* <i>Anemone obtusiloba</i> D. Don | Herb | Ranunculaceae | Maulomuro (Nepali)                         | Roots        | Used to treat external parasite (23).                                                                                                                                                           |
| 29 | <i>Anemonastrum elongatum</i> (D. Don) Holub<br><br>* <i>Anemone elongata</i> D. Don                | Herb | Ranunculaceae | Dhanero (Nepali)                           | Whole plant  | Plant extract is applied to get rid of lice and ectoparasite of the sheep (31).                                                                                                                 |
| 30 | <i>Angiopteris evecta</i> (G. Frost.) Hoffm                                                         | Fern | Marattiaceae  | Gaikhure uneu (Nepali), Bigtagrab (Lepcha) | Rhizome      | Paste is used in foot and mouth disease for cattle (112).                                                                                                                                       |
| 31 | <i>Anisomeles indica</i> (L.) Kuntze                                                                | Herb | Lamiaceae     | Rato charpate (Nepali), Bar (Bantar)       | Leaves       | Leaves used in constipation and tiredness (43).                                                                                                                                                 |
| 32 | <i>Annona squamosa</i> L.                                                                           | Tree | Annonaceae    | Sarifa, Sita phal (Nepali)                 | Leaves       | Used to treat germs and worms of domestic animals (40). Decoction is used in the treatment of wounds. Paste is applied to the animals to remove lice and other external parasitic insects (30). |
| 33 | <i>Arctium lappa</i> L.                                                                             | Herb | Asteraceae    | Kurya (Nepali)                             | Roots        | Decoction is given to cattle to kill intestinal worms (3).                                                                                                                                      |
| 34 | <i>Argemone mexicana</i> L.                                                                         | Herb | Papaveraceae  |                                            | Seeds, Roots | Seed oil used to treat eye complaint (27). Grinded root is used to cure stomach disorder of pigs (101).                                                                                         |

|    |                                                 |      |              |                                         |                        |                                                                                                                                                                                                                                                                                                                                                                                                                            |
|----|-------------------------------------------------|------|--------------|-----------------------------------------|------------------------|----------------------------------------------------------------------------------------------------------------------------------------------------------------------------------------------------------------------------------------------------------------------------------------------------------------------------------------------------------------------------------------------------------------------------|
| 35 | <i>Arisaema tortuosum</i> (Wall.) Schott.       | Herb | Araceae      |                                         | Seeds                  | Used to treat diarrhea and dysentery in goat and sheep (29).                                                                                                                                                                                                                                                                                                                                                               |
| 36 | <i>Artemisia carvifolia</i> Buch.-Ham. ex Roxb. | Herb | Asteraceae   | Titepati (Nepali)                       | Whole plant            | Plant is given to horses during the winter season to keep the body warm (31).                                                                                                                                                                                                                                                                                                                                              |
| 37 | <i>Artemisia indica</i> Willd.                  | Herb | Asteraceae   | Titepati (Nepali),<br>Mugwort (English) | Leaves                 | Fresh leaf juice is applied to bleeding wounds and cuts as a haemostatic and an antiseptic in cattle (2). Leaves used to treat expenal parasite (23,26). This plant with <i>Azadirachta indica</i> and <i>Melia azedarach</i> are taken and cut into pieces, mixed with cornflour, cooked, and fed to cure endoparasite (26). Leaf and camphor are crushed to make a paste and applied in a wounded area twice a day (26). |
| 38 | <i>Artocarpus heterophyllus</i> Lam.            | Tree | Moraceae     | Katahar (Nepali)                        | Leaves,<br>Fruits      | Leaves is directly fed to cattle to control cough (75). The paste of inner part of the fruit is applied to treat mastitis (28). Ripen fruit is fed directly, and the fruit core is applied in teats to cure mastitis (26). Fresh leaves are fed to goats to check diarrhea (30).                                                                                                                                           |
| 39 | <i>Asparagus filicinus</i> Buch.-Ham. ex D.Don  | Herb | Asparagaceae | Kurilo (Nepali)                         | Tender parts,<br>Roots | Tender parts are given to female cattle in case of lactation problems (76). Root juice is given for more milk production (100).                                                                                                                                                                                                                                                                                            |
| 40 | <i>Asparagus officinalis</i> L.                 | Herb | Asparagaceae | Santawar, Kurla                         | Roots                  | Used to increase lactations of cattles. Powder is given as supplementary diet to cattles (30).                                                                                                                                                                                                                                                                                                                             |

|    |                                                                                                                           |        |                 |                                                                                                                                            |             |                                                                                                                                                                                                                                                                                                                                                                                                                                                                                                                                                                                                                                                                                                                                                                                                                                                                                                                                                |
|----|---------------------------------------------------------------------------------------------------------------------------|--------|-----------------|--------------------------------------------------------------------------------------------------------------------------------------------|-------------|------------------------------------------------------------------------------------------------------------------------------------------------------------------------------------------------------------------------------------------------------------------------------------------------------------------------------------------------------------------------------------------------------------------------------------------------------------------------------------------------------------------------------------------------------------------------------------------------------------------------------------------------------------------------------------------------------------------------------------------------------------------------------------------------------------------------------------------------------------------------------------------------------------------------------------------------|
| 41 | <i>Asparagus racemosus</i> Willd.                                                                                         | Herb   | Asparagaceae    | Kurilo, Satawari, Jhirjhire kanda (Nepali); Kurila (Raji); Sunga, Komo (Tamang); Kurla (Tharu), Satmuli (Sanskrit.); Pustu, Lhodu (Gurung) | Roots       | Tuberous roots with other ingredients are fed to the nursing livestock (77). Powder is given as a tonic to a lactating postpartum animal (41,108) and to treat milching disorder (108). Crushed and given to lactating livestock (20,43,80,116). Juice is given as remedy for stomach pain, colic in cattle. Paste is mixed with cattle feed to increase lactation (27,28,81); administered as an invigorating tonic to lactating livestock; a branch is hung in the shed to help sick livestock (44) and also to treat mastitis (28). Crushed and mixed with cattle feed for any bone related problem and mastitis (26). Juice is mixed with corn flour and given to the buffaloes to stimulate milk production (104). Juice is given in case of any worms in hoof or in the stomach, helpful to remove placenta (62). Tubers are cooked and given to cattle to promote lactation (65,68,112). Fed to treat milching disorder of cattle (31). |
| 42 | <i>Auricularia nigricans</i> (Sw.) Birkebak, Looney & Sánchez-García<br><br>* <i>Auricularia polytricha</i> (Mont.) Sacc. | Fungus | Auriculariaceae |                                                                                                                                            | Whole plant | Given in dyspepsia (80).                                                                                                                                                                                                                                                                                                                                                                                                                                                                                                                                                                                                                                                                                                                                                                                                                                                                                                                       |
| 43 | <i>Avena sativa</i> L.                                                                                                    | Herb   | Poaceae         | Jai ghans (Nepali)                                                                                                                         | Leaves      | Grass is fed to increase lactation (28).                                                                                                                                                                                                                                                                                                                                                                                                                                                                                                                                                                                                                                                                                                                                                                                                                                                                                                       |

|    |                                                                                          |         |             |                                             |                                |                                                                                                                                                                                                                                                                                                                                                                                                                                                                                                                            |
|----|------------------------------------------------------------------------------------------|---------|-------------|---------------------------------------------|--------------------------------|----------------------------------------------------------------------------------------------------------------------------------------------------------------------------------------------------------------------------------------------------------------------------------------------------------------------------------------------------------------------------------------------------------------------------------------------------------------------------------------------------------------------------|
| 44 | <i>Azadirachta indica</i> A. Juss.                                                       | Tree    | Meliaceae   | Neem (Nepali),<br>Margosa tree<br>(English) | Leaves,<br>Bark                | Fresh leaves is made into paste and prescribed to mature cattle as an anthelmintic (82); fed to treat intestinal worms (27). Paste is made by crushing leaf and applied to cure ectoparasite, and fed to cure wound; this plant with <i>Artemisia indica</i> and <i>Melia azedarach</i> are taken to prepare formulations and given to cure endoparasites (26). Young leaves are given to cattles to check intestinal worms. Decoction of bark is used to wash cuts and wounds (30). Paste is applied to heal wounds (31). |
| 45 | <i>Bauhinia malabarica</i> Roxb.                                                         | Tree    | Fabaceae    | Tanki (Nepali)                              | Flower                         | Used to treat wounds in neck (80).                                                                                                                                                                                                                                                                                                                                                                                                                                                                                         |
| 46 | <i>Bauhinia purpurea</i> L.                                                              | Tree    | Fabaceae    | Koiralo (Nepali)                            | Leaves                         | Fed to enhance lactation (26).                                                                                                                                                                                                                                                                                                                                                                                                                                                                                             |
| 47 | <i>Bauhinia vahlii</i> Wight & Arn.<br><br>* <i>Phanera vahlii</i> (Wight & Arn.) Benth. | Climber | Fabaceae    | Bharla (Nepali)                             | Bark                           | Dried bark is grounded to make powder and fed with honey to treat joint-related problem (26).                                                                                                                                                                                                                                                                                                                                                                                                                              |
| 48 | <i>Bauhinia variegata</i> L.                                                             | Tree    | Fabaceae    | Koiralo (Nepali)                            | Leaves                         | Given to cows to increase milk production (77).                                                                                                                                                                                                                                                                                                                                                                                                                                                                            |
| 49 | <i>Begonia picta</i> Sm.                                                                 | Herb    | Begoniaceae | Makar kanchi<br>(Nepali)                    | Whole plant,<br>Roots,<br>Stem | Infusion of the root is applied to treat conjunctivitis of buffalos (26). Used to treat diarrhea and dyspepsia (105). Plant is fed to sterile animals to conceive (107). Plant is applied to the animals to wake the barren cattle fertile (31).                                                                                                                                                                                                                                                                           |



|    |                                                                                                                          |       |               |                                                                                                                                              |                               |                                                                                                                                                                                                                                                |
|----|--------------------------------------------------------------------------------------------------------------------------|-------|---------------|----------------------------------------------------------------------------------------------------------------------------------------------|-------------------------------|------------------------------------------------------------------------------------------------------------------------------------------------------------------------------------------------------------------------------------------------|
| 50 | <i>Benincasa pruriens</i> f. <i>hispida</i> (Thunb.) De Wild. & Duyfjes<br><br>* <i>Benincasa hispida</i> (Thunb.) Cogn. | Herb  | Cucurbitaceae | Kubhindo (Nepali)                                                                                                                            | Fruits                        | Used in abortion (23).                                                                                                                                                                                                                         |
| 51 | <i>Berberis aristata</i> DC.                                                                                             | Shrub | Berberidaceae | Chutro (Nepali);<br>Daruharidra,<br>Dwari (Sanskrit);<br>Komme(Gurung)<br>; Cautara<br>(Magar);<br>Trikhula (Raji);<br>Barberry<br>(English) | Fruits,<br>Roots,<br>Bark     | Fruits are fed to animals as pain reliever (83), decoction of root is taken to kill intestinal worms of cattle (81,116). Squeezed bark is fed to treat stomach troubles (107).                                                                 |
| 52 | <i>Bergenia ciliata</i> (Haw.) Sternb.                                                                                   | Herb  | Saxifragaceae | Silphode (Nepali)                                                                                                                            | Roots,<br>Rhizomes,<br>Fruits | Roots and fruits are grounded with other ingredients and fed to the post-delivery livestock to increase lactation and keep livestock healthy (77). Roots used in diarrhea and dysentery (23). Rhizome paste used to treat bone fracture (118). |
| 53 | <i>Betula utilis</i> D. Don                                                                                              | Tree  | Betulaceae    | Bhojpatra (Nepali)                                                                                                                           | Bark                          | Used to treat sprain/pain (23).                                                                                                                                                                                                                |
| 54 | <i>Bistorta milletii</i> Lév.                                                                                            | Herb  | Polygonaceae  | Myakhuri (Nepali)                                                                                                                            | Roots,<br>Fresh plant         | Roots used to treat diarrhea and dysentery (23). Fresh plant is given as nutritious food and to enhance lactation to nak (4).                                                                                                                  |
| 55 | <i>Bistorta vacciniifolia</i> (Wall. ex Meisn.) Greene                                                                   | Herb  | Polygonaceae  | Phulunge jhar (Nepali);<br>Tolowang (Tamang)                                                                                                 | Roots                         | Juice is given orally to relief the fever (4).                                                                                                                                                                                                 |

|    |                                                                                                                            |       |             |                                              |                                   |                                                                                                                                                                                                                                                                                                                                                                                                                                                                                                                                                                  |
|----|----------------------------------------------------------------------------------------------------------------------------|-------|-------------|----------------------------------------------|-----------------------------------|------------------------------------------------------------------------------------------------------------------------------------------------------------------------------------------------------------------------------------------------------------------------------------------------------------------------------------------------------------------------------------------------------------------------------------------------------------------------------------------------------------------------------------------------------------------|
| 56 | <i>Boehmeria virgata</i> var. <i>macrostachya</i> (Wight) Friis & Wilmot-Dear<br><br>* <i>Boehmeria platyphylla</i> D. Don | Shrub | Urticaceae  | Gargalo (Nepali)                             | Roots, Whole plant                | Root paste is given to cattle to treat diarrhea (70). Decoction of the plant is given to livestock for diarrhea and dysentery; root paste is used to treat cattle wounds and cuts (84, 85). Plant decoction is given to cattle to check diarrhea (30, 31).                                                                                                                                                                                                                                                                                                       |
| 57 | <i>Boenninghausenia albiflora</i> (Hook.) Rchb. ex Meisn.                                                                  | Herb  | Rutaceae    | Uruse jhar, Dampate (Nepali); Urmen (Tamang) | Whole plant, Leaves               | Plant is poisonous to animal (71). Juice of plant is spread to get rid of bugs; it is also applied on the body to remove lice or other ectoparasites on the body of domestic animals (18). Plant powder is applied all over the body externally to remove the parasitic insect (4). Fresh twigs and leaves are grounded with camphor and applied to the wound (26). Fresh plant or smoke of dried plant is used in repelling fleas of poultry (101). Leaf juice of plant is applied over body to remove lice and other external parasite and insects (26,30,31). |
| 58 | <i>Bombax ceiba</i> L.                                                                                                     | Tree  | Bombacaceae | Simal (Nepali); Kakdhong (Tamang)            | Bark, Flowers, Seeds, Whole plant | Plant used as veterinary medicine (39). Bark extract is applied for the boils (4). Flower is crushed and fed to cure constipation; powder obtained from bark is mixed with powder of pepper and ginger, and then given orally to cure dysentery; raw bark is crushed to obtain juice and given to remove the placenta; seeds are grounded with mustard oil, and then applied to treat the wounds (26,49). Seed paste used to treat indigestion and dislocated bones (29). Bark decoction is                                                                      |

|    |                                                                                            |       |                |                                                                   |                  |                                                                                                                                                                             |
|----|--------------------------------------------------------------------------------------------|-------|----------------|-------------------------------------------------------------------|------------------|-----------------------------------------------------------------------------------------------------------------------------------------------------------------------------|
|    |                                                                                            |       |                |                                                                   |                  | given to cattle to check dysentery, reduce inflammations; bark paste is applied locally to get relief from cut and wounds (30).                                             |
| 59 | <i>Brassica napas</i> L.                                                                   | Herb  | Brassicaceae   |                                                                   | Seeds            | Warmed oil used to treat chronic cough (27).                                                                                                                                |
| 60 | <i>Brassica nigra</i> (L.)<br>W.D.J.Koch                                                   | Herb  | Brassicaceae   | Tori (Nepali)                                                     | Seeds            | Mustard cake is mixed with maize flour, and fed to increase milk production, cake is applied to cure scabies (26).                                                          |
| 61 | <i>Brassica rapa</i> L.<br><br>* <i>Brassica campestris</i> L.<br>var. <i>sarson</i> Prain | Herb  | Brassicaceae   | Salagam (Nepali)                                                  | Seeds            | Seed oil cake is useful for cattle food (84).                                                                                                                               |
| 62 | <i>Brassica</i> sp.                                                                        | Herb  | Brassicaceae   |                                                                   | Roots            | Used to treat bloat/tympani (23).                                                                                                                                           |
| 63 | <i>Bridelia retusa</i> (L.) A.<br>Juss.                                                    | Tree  | Phyllanthaceae | Gayo (Nepali)                                                     | Young leaves     | Young leaves are poisonous to cattle (86).                                                                                                                                  |
| 64 | <i>Brucea javanica</i> (L.)<br>Merr.<br><br>* <i>Rhus javanica</i> L.                      | Tree  | Anacardiaceae  | Bhaki amilo<br>(Nepali);<br>Bhakmilo<br>(Tharu), Muruk<br>(Magar) | Fruits           | Decoction is given to animals in case of foot and mouth diseases (84,87). Ripe fruits are used as appetizer for livestock (88), given to treat diarrhea and dysentery (26). |
| 65 | <i>Bupleurum candollei</i><br>Wall.                                                        | Herb  | Apiaceae       | Tsa Duk (Sherpa)                                                  | Leaves,<br>Roots | Leaves are poisonous to cattle (1,25,29); root juice is dropped in the wound to kill germs and heal quickly (29).                                                           |
| 66 | <i>Caesalpinia decapetala</i><br>(Roth.) Alston                                            | Shrub | Fabaceae       | Ulte kanda<br>(Nepali)                                            | Roots            | Juice is applied to treat sprain and muscular swelling of animals (71).                                                                                                     |
| 67 | <i>Caesulia axillaris</i> Roxb.                                                            | Herb  | Asteraceae     | Phalewa,<br>Thukaha<br>(Danuwar)                                  | Whole plant      | Juice given to domestic animal as tonic (89).                                                                                                                               |

|    |                                                                                              |       |             |                                |               |                                                                                                                                                                                                                                                                                                 |
|----|----------------------------------------------------------------------------------------------|-------|-------------|--------------------------------|---------------|-------------------------------------------------------------------------------------------------------------------------------------------------------------------------------------------------------------------------------------------------------------------------------------------------|
| 68 | <i>Cajanus scarabaeoides</i> (L.) Thouars<br><br>* <i>Atylosia scarabaeoides</i> (L.) Benth. | Herb  | Fabaceae    | Bhatmase ghans (Nepali)        | Fresh plant   | Fresh plant is given to the cattle in diarrhea (4). Plant juice is given to treat diarrhea (29).                                                                                                                                                                                                |
| 69 | <i>Callicarpa macrophylla</i> Vahl                                                           | Tree  | Lamiaceae   | Gunelo (Nepali)                | Leaves        | Used as veterinary medicine (39).                                                                                                                                                                                                                                                               |
| 70 | <i>Calotropis gigantea</i> (L.) W. T. Aiton                                                  | Shrub | Apocynaceae | Aank (Nepali)                  | Leaves, Roots | Lightly crushed leaves are warmed on fire and kept on swelling joint (26). Juice used to treat diarrhea with other ingredients; root paste with other ingredients is used to treat wounds on shoulder of an ox or a buffalo (29). Leaves caused diarrhea if the fodder is given in winter (31). |
| 71 | <i>Calotropis procera</i> (Aiton) Aiton fil.                                                 | Shrub | Apocynaceae | Akon                           | Latex         | Latex drop is given orally to reduce stomachache of domestic animals; latex mixed with honey is applied locally to reduce inflammations on the body (30).                                                                                                                                       |
| 72 | <i>Campylotropis speciosa</i> (Schindl.) Schindl.                                            | Shrub | Fabaceae    | Sakino (Nepali), Mena (Tamang) | Leaves        | Paste is applied over the dislocated bones to hasten up the process of healing particularly for the cows (4).                                                                                                                                                                                   |

|    |                           |      |             |                                                                                                     |                              |                                                                                                                                                                                                                                                                                                                                                                                                                                                                                                                                                                                                                                                                                                                                                                                                                                                                                                                                                                                                                                                                                                                                                                                                   |
|----|---------------------------|------|-------------|-----------------------------------------------------------------------------------------------------|------------------------------|---------------------------------------------------------------------------------------------------------------------------------------------------------------------------------------------------------------------------------------------------------------------------------------------------------------------------------------------------------------------------------------------------------------------------------------------------------------------------------------------------------------------------------------------------------------------------------------------------------------------------------------------------------------------------------------------------------------------------------------------------------------------------------------------------------------------------------------------------------------------------------------------------------------------------------------------------------------------------------------------------------------------------------------------------------------------------------------------------------------------------------------------------------------------------------------------------|
| 73 | <i>Cannabis sativa</i> L. | Herb | Cannabaceae | Ganja, bhango (Nepali); Wang/Sima (Tamang), Gagima, Kantsya (Gurung); Bhanga (Raji); Hemp (English) | Leaves, seeds, inflorescence | Seed decoction is given to mature cattle along with other cooked foods for its alleged anthelmintic action (82). Plant juice is given to cattle to cure diarrhoea (45). Decoction of leaves is fed to cure diarrhea (31,61,75). Power of dried leaf is fed to animals in case of diarrhea (62), cough and cold (71). Seed decoction with other ingredients is given to cattle in diarrhea (41). Leaf powder is mixed with cattle feed to treat veterinary problems (20). Leaves used to treat diarrhea and cold (23,113). Fresh leaves and inflorescence are fed to treat the diarrhea (4,49,80,81,86,105). Paste from flowering tops is given to treat diarrhea (27). Seeds given to livestock to treat dysentery (115). The mixture of leaf and seed is grounded then drenched with water to cure diarrhea, fever, and urinary related problems (26). Leaves are fed to animals to treat diarrhea (111). Infusion of young leaves and inflorescences with fruits of <i>Datura metel</i> is given to cattle in flatulence and stomachache (65). The twig is fed to animals to check diarrhea (30). Roasted seeds given to cattle to treat diarrhea and to get relief from swollen stomach (118). |
| 74 | <i>Capsicum annuum</i> L. | Herb | Solanaceae  | Khursani (Nepali)                                                                                   | Fruits                       | Directly given to the animal to treat urinary related problem (26). Ripe fruits are used to cure chronic cough disease of the domestic cattle (30).                                                                                                                                                                                                                                                                                                                                                                                                                                                                                                                                                                                                                                                                                                                                                                                                                                                                                                                                                                                                                                               |

|    |                                           |         |             |                               |                                    |                                                                                                                                                                                                                                                                     |
|----|-------------------------------------------|---------|-------------|-------------------------------|------------------------------------|---------------------------------------------------------------------------------------------------------------------------------------------------------------------------------------------------------------------------------------------------------------------|
| 75 | <i>Capsicum frutescens</i> L.             | Herb    | Solanaceae  | Jire khursani (Nepali)        | Leaves                             | Paste with other ingredients is used to treat mumps (29).                                                                                                                                                                                                           |
| 76 | <i>Cardiospermum halicacabum</i> L.       | Climber | Sapindaceae | Kesh lahara (Nepali)          | Roots                              | Paste used to remove lice or any other ectoparasites (29).                                                                                                                                                                                                          |
| 77 | <i>Carica papaya</i> L.                   | Tree    | Caricaceae  | Mewa (Nepali)                 | Seeds                              | Matured dry seeds are crushed to make powder, and given orally to cattle against internal parasites (26).                                                                                                                                                           |
| 78 | <i>Carissa carandas</i> L.                | Shrub   | Apocynaceae |                               | Roots                              | Decoction is given in case of blood dysentery of cattle (31).                                                                                                                                                                                                       |
| 79 | <i>Carthamus tinctorius</i> L.            | Herb    | Asteraceae  | Kusum (Nepal)                 | Seeds                              | Oil is applied over the wound to 'Khorahiya' cure foot and rot disease (30).                                                                                                                                                                                        |
| 80 | <i>Cassia fistula</i> L.                  | Tree    | Fabaceae    | Amaltas, Rajbrikshya (Nepali) | Fruits, Seeds, Bark, Leaves, Roots | Paste of seeds applied around the umbilicus (belly button) as a diuretic (41). Grinded seeds with other ingredients is given to cattle for treating urinary disorder (120). Dried seeds and fruits are ground to make powder, and fed to cure urinary problem (26). |
| 81 | <i>Cassiope fastigiata</i> (Wall.) D. Don | Shrub   | Ericaceae   | Phursan (N.), Nyamlu (Tam.)   | Aerial parts                       | Powder is applied all over the swellings of the limb which are believed to be due to ghost; plants are also given to cattles for lactation (4).                                                                                                                     |
| 82 | <i>Cedrus deodara</i> (Lamb.) G. Don      | Tree    | Pinaceae    | Devadar (Nepali)              | Resin                              | Resin is used to treat external parasite (23).                                                                                                                                                                                                                      |
| 83 | <i>Centella asiatica</i> (L.) Urb.        | Herb    | Apiaceae    | Ghodtapre (Nepali)            | Whole plant                        | Plant used as veterinary medicine (39). Fresh plants are fed to the horses in case of the urinary problems (4,31). Leaves are roasted, cooled and given in diarrhea (27).                                                                                           |

|    |                                                                              |         |                |                                               |              |                                                                                                                                                                           |
|----|------------------------------------------------------------------------------|---------|----------------|-----------------------------------------------|--------------|---------------------------------------------------------------------------------------------------------------------------------------------------------------------------|
|    |                                                                              |         |                |                                               |              | Whole plant is fed to animals to treat urinary disorders (26,28).                                                                                                         |
| 84 | <i>Chenopodium album</i> L.                                                  | Herb    | Amaranthaceae  | Bethe (Nepali)                                | Whole plant  | Crushed and obtained juice is given orally to treat dysentery (26).                                                                                                       |
| 85 | <i>Chromolaena odorata</i> (L.) R. King & H. Rob.                            | Shrub   | Asteraceae     | Seto Banmara (Nepali)                         | Leaves       | Decoction is applied to stop bleeding as well as skin ring of cattle (75).                                                                                                |
| 86 | <i>Cirsium verutum</i> (D.Don) Spreng.                                       | Herb    | Asteraceae     | Thakal kanda (Nepali),<br>Pongjugale (Tamang) | Roots        | Juice is given to yaks and naks in cases of constipation and urinary problem (4).                                                                                         |
| 87 | <i>Cissampelos arenicola</i> M. Nee & R. Ortiz                               | Climber | Menispermaceae |                                               | Aerial parts | Used to treat bleeding (115).                                                                                                                                             |
| 88 | <i>Cissampelos pareira</i> L. var. <i>hirsuta</i> (Buch.-Ham. ex DC.) Forman | Climber | Menispermaceae | Musya belo (Nepali)                           | Roots        | Juice is dropped on the wounds of animals to dispel any germs and worms (90); used to treat urinary problems (79) and also given to treat tapeworm (80).                  |
| 89 | <i>Cissus quadrangularis</i> L.                                              | Climber | Vitaceae       | Hadjor (Nepali)                               | Stem         | Stem paste is applied to cure dislocated bone of animals (30).                                                                                                            |
| 90 | <i>Cissus repens</i> Lam.                                                    | Climber | Vitaceae       | Charchare laharo (Nepali)                     | Stem         | Stem is gently crushed to obtain juice and applied to any eye problem (26).                                                                                               |
| 91 | <i>Citrus medica</i> L.                                                      | Tree    | Rutaceae       | Bimiro, Mahulunga, Chuk (Nepali)              | Fruits       | Juice given orally to cattle against ascaris (91). Juice obtained by pounding root and given orally to treat endoparasite (26). Juice is used as anti-poison remedy (29). |

|    |                                                                                 |         |               |                                                 |                         |                                                                                                                                                                                                                                                                                                  |
|----|---------------------------------------------------------------------------------|---------|---------------|-------------------------------------------------|-------------------------|--------------------------------------------------------------------------------------------------------------------------------------------------------------------------------------------------------------------------------------------------------------------------------------------------|
| 92 | <i>Citrus grandis</i> (L.)<br>Osbeck<br><br>* <i>Citrus maxima</i> Merr.        | Tree    | Rutaceae      |                                                 | Leaves                  | Leaves are crushed and mixed with cornflour to cure endoparasite; juice obtained is mixed with salt and applied to eye problem (26).                                                                                                                                                             |
| 93 | <i>Citrus limon</i> (L.) Burm. f.                                               | Tree    | Rutaceae      | Nibuwa (Nepali)                                 | Fruits                  | Juice is fed to treat stomachache (28). Lemon juice is mixed with egg. If head smut infected corn is available then its powder is mixed and given to animal to cure fever; juice is rubbed to swelling area (26).                                                                                |
| 94 | <i>Clausena excavata</i> Burm. fil.                                             | Shrub   | Rutaceae      | Bhanbhaniya (Danuwar)                           | Whole plant             | Used to remove ectoparasites of poultry (46).                                                                                                                                                                                                                                                    |
| 95 | <i>Clausena pentaphylla</i> Lam. ex DC.                                         | Tree    | Rutaceae      |                                                 | Whole plant             | Plant used as veterinary medicine (39).                                                                                                                                                                                                                                                          |
| 96 | <i>Clematis buchananiana</i> DC.                                                | Climber | Ranunculaceae | Junge lahara (Nepali),<br>Nasarpelandu (Tamang) | Leaves                  | Pounded and applied all over the burns and fed to the yaks for the inflammation during the burn (4).                                                                                                                                                                                             |
| 97 | <i>Clematis graveolens</i> Lindl.                                               | Climber | Ranunculaceae | Nasar lahara (Nepali)                           | Whole plant             | Paste applied to treat wound on the shoulder of an ox or a buffalo, caused by yoke (29). Given to horse during winter to keep body warm (31).                                                                                                                                                    |
| 98 | <i>Clerodendrum infortunatum</i> L.<br><br>* <i>Clerodendrum viscosum</i> Vent. | Shrub   | Lamiaceae     | Bhanthi (Danuwar),<br>Bhant (Nepali)            | Leaves,<br>Young shoots | Plant used as veterinary medicine (39). Leaf juice is applied on cattle body to remove lice (45,46). Leaves juice is fed to treat intestinal worms (27). Decoction of young shoots is given to animals to get relief from stomach swelling caused by indigestion. Leaf juice is applied over the |



|     |                                        |         |               |                                 |                     |                                                                                                                                                                                                                                                                    |
|-----|----------------------------------------|---------|---------------|---------------------------------|---------------------|--------------------------------------------------------------------------------------------------------------------------------------------------------------------------------------------------------------------------------------------------------------------|
|     |                                        |         |               |                                 |                     | body and wounds of animals as an insecticide (30).                                                                                                                                                                                                                 |
| 99  | <i>Codonopsis viridis</i> Wall.        | Climber | Campanulaceae |                                 | Aerial parts        | Used to treat constipation in cattle (121).                                                                                                                                                                                                                        |
| 100 | <i>Coelogyne cristata</i> Lindl.       | Herb    | Orchidaceae   | Chandi gava (Nepali)            | Bulb                | Juice applied to skin boils and wounded hooves of cattle (92).                                                                                                                                                                                                     |
| 101 | <i>Colebrookea oppositifolia</i> Sm.   | Shrub   | Lamiaceae     | Dhurseli (Nepali)               | Leaves              | Juice is put into the eye to treat conjunctivitis (28,31,81,89), cataract (101), corneal opacity (28,69) and as an anthelmintic in cattles (4,31). Juice of young bud is applied to remove leech from nose of cattle (75). Plant used as veterinary medicine (39). |
| 102 | <i>Colocasia esculenta</i> (L.) Schott | Herb    | Araceae       | Karkalo (Nepali)                | Leaves, Stem        | Small pieces are made by cutting them and given to animal by cooking with cornflour to cure endoparasite and diarrhea (26).                                                                                                                                        |
| 103 | <i>Commelina benghalensis</i> L.       | Herb    | Commelinaceae | Kane jhar, Kana gujgaj (Nepali) | Whole plant, Leaves | Used as an antiseptic (91). Paste obtained from leaf is made and applied locally on fresh wounds in animals as antiseptic (26). Juice is applied locally on fresh cuts in animals as an insecticide (30).                                                          |
| 104 | <i>Corchorus capsularis</i> L.         | Shrub   | Malvaceae     | Jute Plant (Nepali)             | Stem                | Stem is burned, and obtained ash is mixed with mustard, then fed to treat diarrhea (26).                                                                                                                                                                           |
| 105 | <i>Coriandrum sativum</i> L.           | Herb    | Apiaceae      | Dhaniya (Nepali)                | Aerial parts        | Given for better milk production (80).                                                                                                                                                                                                                             |
| 106 | <i>Crateva unilocularis</i> Buch.-Ham  | Tree    | Capparaceae   | Simlikan (Nepali)               | Leaves, Stem        | Directly fed to cure endoparasite (26).                                                                                                                                                                                                                            |

|     |                                                                            |         |                |                                              |                       |                                                                                                                                                                                                                                                   |
|-----|----------------------------------------------------------------------------|---------|----------------|----------------------------------------------|-----------------------|---------------------------------------------------------------------------------------------------------------------------------------------------------------------------------------------------------------------------------------------------|
| 107 | <i>Crinum amoenum</i> Ker Gawl. ex Roxb.                                   | Herb    | Amaryllidaceae |                                              | Rhizomes              | Given in case of dysentery of cattle (31).                                                                                                                                                                                                        |
| 108 | <i>Crotalaria spectabilis</i> Roth.                                        | Herb    | Fabaceae       | Bhuban jhar (Nepali)                         | Leaves and shoots     | Tender leaves and shoots are considered poisonous to cattle; paste of tender leaves is applied to treat wounds and with other ingredients it is used to treat muscular swelling (29).                                                             |
| 109 | <i>Croton caudatus</i> Geiseler                                            | Shrub   | Euphorbiaceae  |                                              | Leaves                | Plant is poisonous (101).                                                                                                                                                                                                                         |
| 110 | <i>Cryptolepis buchananii</i> Schult. ex Roem. & Schult.                   | Climber | Apocynaceae    | Seto dhudiya (Tharu), Dudh Lati              | Leaves, whole plant   | Leaves fed to animal as galactagogue (47). The plant is hung around the neck of wheezing livestock (44); tied around the neck of the cattles to get relief from swelling (30).                                                                    |
| 111 | <i>Cucumis maderaspatanus</i> L.<br><i>*Mukia maderaspatana</i> (L.) Roem. | Climber | Cucurbitaceae  | Ladbhadi (Bantar), Sunkeshre laharo (Nepali) | Seeds, Leaves, Fruits | Seed paste is applied to treat scabies of animals (86). Squeezed fruit is applied to treat scabies in animals (87). Leaves used in constipation and tiredness (40).                                                                               |
| 112 | <i>Cucumis melo</i> L.                                                     | Climber | Cucurbitaceae  | Kharbuja (Nepali)                            | Seeds                 | Used in abortion (23).                                                                                                                                                                                                                            |
| 113 | <i>Cucumis sativus</i> L.                                                  | Climber | Cucurbitaceae  | Kakro (Nepali)                               | Whole plant, Seeds    | Whole plant is boiled with food and given to cattle for the expulsion of placenta (3). Used to treat blood in urine with other plants (27). Dried seeds are crushed to make powder and fed by drenching with water to cure urinary problems (26). |

|     |                                       |         |               |                                                                                                    |                           |                                                                                                                                                                                                                            |
|-----|---------------------------------------|---------|---------------|----------------------------------------------------------------------------------------------------|---------------------------|----------------------------------------------------------------------------------------------------------------------------------------------------------------------------------------------------------------------------|
| 114 | <i>Cucurbita maxima</i><br>Duchesne   | Climber | Cucurbitaceae | Pharsi (Nepali)                                                                                    | Whole<br>plant,<br>Fruits | Given to cattle for expulsion of remained placenta and also indigestion in cattle (3). Ripen yellow pumpkin is cooked with cornflour and feed to cure mastitis (26).                                                       |
| 115 | <i>Cucurbita pepo</i> L.              | Climber | Cucurbitaceae | Pharsi, Kadu<br>(Nepali)                                                                           | Fruits                    | Cooked and given to cattle for expulsion of remained placenta, laxative (3).                                                                                                                                               |
| 116 | <i>Curculigo orchoides</i><br>Gaertn. | Herb    | Hypoxidaceae  | Kalo musali<br>(Nepali)                                                                            | Roots,<br>Leaves          | Roots used as aphrodisiac for cattle (19). Tender leaf juice is used to treat eye problems (29).                                                                                                                           |
| 117 | <i>Curcuma angustifolia</i><br>Roxb.  | Herb    | Zingiberaceae | Besar (Nepali)                                                                                     | Rhizomes                  | Decoction is given to domestic animals to treat constipation (116).                                                                                                                                                        |
| 118 | <i>Curcuma aromatica</i><br>Salisb.   | Herb    | Zingiberaceae | Kalo haledo,<br>Kachur,<br>Banhaldi, Besar<br>(Nepali); Hardi<br>(Magar);<br>Turmeric<br>(English) | Rhizomes                  | Used to cure broken horn in cattle (91), used as buti, food poisoning "Nas-Kapat" (69).                                                                                                                                    |
| 119 | <i>Curcuma longa</i> L.               | Herb    | Zingiberaceae | Besar (Nepali)                                                                                     | Rhizomes                  | Used to treat external wounds (23). Dried rhizome is crushed and mixed with mustard oil. Then, applied in burn area, wound and to treat ectoparasite; little powder is blown to the eye to treat eye-related problem (26). |

|     |                                                                                                 |          |                |                                             |                           |                                                                                                                                                                                                                                                                                                                                                                                                                                                                                                                                                                                          |
|-----|-------------------------------------------------------------------------------------------------|----------|----------------|---------------------------------------------|---------------------------|------------------------------------------------------------------------------------------------------------------------------------------------------------------------------------------------------------------------------------------------------------------------------------------------------------------------------------------------------------------------------------------------------------------------------------------------------------------------------------------------------------------------------------------------------------------------------------------|
| 120 | <i>Cuscuta reflexa</i> Roxb.                                                                    | Parasite | Convolvulaceae | Akashlati,<br>Amarlati,<br>Nagbeli (Nepali) | Shoots,<br>Whole<br>plant | Shoot is used for pneumonia and cough of cattle (17). Whole plant used to prepare medicine to treat livestock with cough and throat allergy (93). Plant juice is given with crushed garlic to cattle in case of indigestion (48) and stomach disorders (4). Mixed with other plants and given to treat animals suffering from asthma (122). Stem with other formulation is given orally to cattle against endoparasites (26). Decoction of the plant is used to get relief from pain by massaging locally (30). Plant given to domestic animals suffering from fever and dysentery (68). |
| 121 | <i>Cymbidium goeringii</i> f.<br><i>albiflorum</i> (S.S.Ying)<br>S.S.Ying                       | Herb     | Orchidaceae    |                                             | Roots                     | Paste applied to set dislocated bones of leg (31).                                                                                                                                                                                                                                                                                                                                                                                                                                                                                                                                       |
| 122 | <i>Cymbidium elegans</i> var.<br><i>elegans</i><br><br>* <i>Cymbidium longifolium</i><br>D. Don | Herb     | Orchidaceae    |                                             | Roots                     | Boiled root juice fed to livestock suffering from cold (92).                                                                                                                                                                                                                                                                                                                                                                                                                                                                                                                             |
| 123 | <i>Cymbopogon flexuosus</i><br>(Nees ex Steud) W.<br>Watson.                                    | Herb     | Poaceae        | Chel (Nepali),<br>Yukpa (Tamang)            | Leaves                    | Given as good fodder to naks and cows to enhance lactation (4).                                                                                                                                                                                                                                                                                                                                                                                                                                                                                                                          |
| 124 | <i>Cynanchum auriculatum</i><br>Royle ex Wight                                                  | Climber  | Apocynaceae    | Kauwaloli<br>(Bantar)                       | Seeds                     | Used to treat nipple infection (bleeding while drawing out milk) (40).                                                                                                                                                                                                                                                                                                                                                                                                                                                                                                                   |
| 125 | <i>Cynodon dactylon</i> (L.)<br>Pers.                                                           | Herb     | Poaceae        | Dubo (Nepali)                               | Whole<br>plant            | Used as veterinary medicine (39). Whole plant is fed to livestock twice a day to enhance the lactation; paste is made by                                                                                                                                                                                                                                                                                                                                                                                                                                                                 |

|     |                                              |         |               |                                          |                 |                                                                                                                                                                                                                                                                                                                                                                                                                  |
|-----|----------------------------------------------|---------|---------------|------------------------------------------|-----------------|------------------------------------------------------------------------------------------------------------------------------------------------------------------------------------------------------------------------------------------------------------------------------------------------------------------------------------------------------------------------------------------------------------------|
|     |                                              |         |               |                                          |                 | crushing the whole plant and applied in a wounded area (26).                                                                                                                                                                                                                                                                                                                                                     |
| 126 | <i>Cyperus difformis</i> L.                  | Herb    | Cyperaceae    | Mothe Jhar (Nepali)                      | Roots           | Root nodules are crushed and fed to cure any urinary related problem (26).                                                                                                                                                                                                                                                                                                                                       |
| 127 | <i>Cyperus rotundus</i> L.                   | Herb    | Cyperaceae    |                                          | Stem and leaves | Used to treat anthelmintic (115).                                                                                                                                                                                                                                                                                                                                                                                |
| 128 | <i>Dactylicapnos scandens</i> (D.Don) Hutch. | Climber | Papaveraceae  | Jogi lahara (Nepali)                     | Aerial parts    | Fed to animals as an anthelmentic medicine (71).                                                                                                                                                                                                                                                                                                                                                                 |
| 129 | <i>Dalbergia sissoo</i> D.C.                 | Tree    | Fabaceae      | Sisau (Nepali)                           | Leaves          | Juice in given in blood dysentery (27). Leaf is crushed to obtain juice, and then mixed with churning curd, and fed to cure diarrhea (26). Leaves are given to cattle to check dysentery and kill intestinal worms (30).                                                                                                                                                                                         |
| 130 | <i>Daphne bholua</i> Buch.-Ham ex D. Don     | Shrub   | Thymelaeaceae | Kagatpate (Nepali), Syukudhumbu (Tamang) | Flowers         | Juice is put into the nostrils of the yaks to remove the leech during the rainy season (4).                                                                                                                                                                                                                                                                                                                      |
| 131 | <i>Datura metal</i> L.                       | Shrub   | Solanaceae    | Daturo (Nepali), Dhuthur (Bantar)        | Fruits, Leaves  | Used to treat diarrhoea (27,40,101) and to treat inflammation (27). Leaf juice used to treat shoulder wound, leaves used to treat joint swelling (27). Fruits are roasted on open fire, and fed to treat diarrhea, dysentery and fever (26). Paste of immature fruit mixed with other ingredients is used to treat diarrhea and dysentery (29). Leaves are toxic to livestock (101). Roasted fruits are given to |

|     |                                           |       |               |                                                          |                            |                                                                                                                                                                                                                                                                                                         |
|-----|-------------------------------------------|-------|---------------|----------------------------------------------------------|----------------------------|---------------------------------------------------------------------------------------------------------------------------------------------------------------------------------------------------------------------------------------------------------------------------------------------------------|
|     |                                           |       |               |                                                          |                            | domestic cattle to induce sleep and to check diarrhea (30).                                                                                                                                                                                                                                             |
| 132 | <i>Datura stramonium</i> L.               | Shrub | Solanaceae    | Daturo (Nepali)                                          | Seeds                      | Used to cure indigestion in cattle (74).                                                                                                                                                                                                                                                                |
| 133 | <i>Delphinium brunonianum</i> Royle       | Herb  | Ranunculaceae | Bisadi ghans (Nepali)                                    | Roots, Leaves              | Used in dysentery and ticks in cattle (123).                                                                                                                                                                                                                                                            |
| 134 | <i>Delphinium cashmerianum</i> Royle      | Herb  | Ranunculaceae |                                                          | Roots, Leaves              | Used to kill intestinal worms and teaks in cattle (3).                                                                                                                                                                                                                                                  |
| 135 | <i>Delphinium grandiflorum</i> L.         | Herb  | Ranunculaceae | Chharkhang (Tibetan)                                     | Leaves                     | Used to kill teaks in cattle (3).                                                                                                                                                                                                                                                                       |
| 136 | <i>Delphinium himalayae</i> Munz          | Herb  | Ranunculaceae | Atis, Nirmansi (Nepali), Bhongmar (Tamang)               | Roots                      | Root paste is kept in hoof of animal to expel worms (31,119). It is used to treat diseases in hooves of cattle and also in foot disease in cattle (3). Mixed with other plant and juice is given to treat animals suffering from asthma, roots are also used to kill lice and bed bugs on cattle (122). |
| 137 | <i>Delphinium scabriflorum</i> D. Don     | Herb  | Ranunculaceae | Toyoring (Tamang)                                        | Whole plant, Roots, Leaves | Juice from whole plant is used to kill worms in wounds of cattle (1). Juice from root or leaves is used to treat wounds (29). Plant infusion is applied to remove worms from the wounds in the hooves of cattle (31).                                                                                   |
| 138 | <i>Delphinium vestitum</i> Wall.          | Herb  | Ranunculaceae | Mauare mauilo, Mangra mhul (Magar), Atish, Bikh (Nepali) | Roots                      | Root juice is given to animal during delivery (73) and food poisoning in cattle (121).                                                                                                                                                                                                                  |
| 139 | <i>Dendrobium amoenum</i> Wall. ex Lindl. | Herb  | Orchidaceae   | Hardjorne (Nepali)                                       | Stem                       | Crushed and used in bone fracture of cattle (81,116).                                                                                                                                                                                                                                                   |

|     |                                                                                   |          |               |                          |                |                                                                                                                                                                                   |
|-----|-----------------------------------------------------------------------------------|----------|---------------|--------------------------|----------------|-----------------------------------------------------------------------------------------------------------------------------------------------------------------------------------|
| 140 | <i>Dendrobium longicornu</i> Lindl.                                               | Herb     | Orchidaceae   |                          | Roots          | Boiled root fed to livestock suffering from coughs (92).                                                                                                                          |
| 141 | <i>Dendrocalamus strictus</i> (Roxb.) Nees                                        | Tree     | Poaceae       | Tama bans (Nepali)       | Leaves         | Tonic to ailing livestock, but long time feeding act as antilactagogue (101).                                                                                                     |
| 142 | <i>Dendrophthoe falcata</i> (L. fil.) Blume                                       | Parasite | Loranthaceae  |                          | Leaves, Nectar | Leaves paste is applied on fractures for setting bones (64) and livestock worms (50,120). Leaf along with other plant are made into paste and used to treat bone fractures (124). |
| 143 | <i>Desmodium confertum</i> DC.                                                    | Shrub    | Fabaceae      |                          | Leaves         | Given for better lactation (3).                                                                                                                                                   |
| 144 | <i>Didymocarpus albicalyx</i> C. B. Clarke                                        | Herb     | Gesneriaceae  | Kumkum dhup (Nepali)     | Whole plant    | Used to energize weak animals (80).                                                                                                                                               |
| 145 | <i>Didymocarpus aromaticus</i> Wall. ex D. Don                                    | Herb     | Gesneriaceae  |                          | Whole plant    | Juice of plant is fed to domestic animals to treat bovine haematuria (18).                                                                                                        |
| 146 | <i>Dimetia scandens</i> (Roxb.) R.J. Wang<br><br>* <i>Hedyotis scandens</i> Roxb. | Shrub    | Rubiaceae     |                          | Whole plant    | Plant is given to enhance secretion of milk (31).                                                                                                                                 |
| 147 | <i>Dioscorea bulbifera</i> L.                                                     | Climber  | Dioscoreaceae |                          | Bulb           | Juice used as astringent (28).                                                                                                                                                    |
| 148 | <i>Dioscorea deltoidea</i> Wall. ex Griseb.                                       | Climber  | Dioscoreaceae | Gittha, Bhyakur (Nepali) | Roots, Tubers  | Paste given in diphtheria (69,112). Juice obtained from tuber is given twice a day to treat constipation (26).                                                                    |

|     |                                                                                    |         |               |                                     |                           |                                                                                                                                                                                                                                                                                                                                                                                                  |
|-----|------------------------------------------------------------------------------------|---------|---------------|-------------------------------------|---------------------------|--------------------------------------------------------------------------------------------------------------------------------------------------------------------------------------------------------------------------------------------------------------------------------------------------------------------------------------------------------------------------------------------------|
| 149 | <i>Dioscorea pentaphylla</i> L.                                                    | Climber | Dioscoreaceae | Mithe tarul (Nepali)                | Tuber                     | Crushed mass of tuber is given to cattle when they become sick by eating green leaves of maize. Raw tuber is given to cattle to cure 'vyagute rog' (diphtheria) (94).                                                                                                                                                                                                                            |
| 150 | <i>Diploknema butyracea</i> (Roxb.) H.J.Lam<br><br>* <i>Bassia butyracea</i> Roxb. | Tree    | Sapotaceae    | Chiuri (Nepali), Singmar (Tamang)   | Root, Fruits, Seeds, Bark | Root is crushed to make a paste and fed to cure fever; fruit is crushed and paste obtained is applied to cure mastitis; bark is ground with water and applied by mixing with camphor to cure the wound (26). The crushed ripe fruits are applied externally for skin problems (104). Seed extract is applied on nose of livestock to expel leeches (101). Oil cake is poisonous to chicken (31). |
| 151 | <i>Drimia indica</i> (Roxb.) Jessop<br><br>* <i>Urginea indica</i> (Roxb.) Kunth   | Herb    | Asparagaceae  | Ban piyaz (Nepali)                  | Bulb                      | Paste is given in fever (27). Tuber paste is given to get relief from stomach swelling and indigestion (30).                                                                                                                                                                                                                                                                                     |
| 152 | <i>Drynaria propinqua</i> (Wall.ex Mett.) J.Sm. apud Bedd.                         | Fern    | Polypodiaceae | Kamari (Nepali), Nakabhyak (Tamang) | Rhizomes                  | Paste is applied on bone fracture (4).                                                                                                                                                                                                                                                                                                                                                           |
| 153 | <i>Drynaria quercifolia</i> (L.) J.Sm.                                             | Fern    | Polypodiaceae |                                     | Whole plant               | Plant is hung in the shed to treat or prevent arheya (= 21/2), a disease; killing affected livestock within 21/2 hours (44).                                                                                                                                                                                                                                                                     |
| 154 | <i>Eclipta prostrata</i> (L.) L.                                                   | Herb    | Asteraceae    | Bhringraj (Nepali)                  | Whole plant               | Juice is dripped into the eyes of livestock for cleansing purposes and to treat white spots (44). Paste prepared from the whole plant is applied to treat mastitis (28).                                                                                                                                                                                                                         |



|     |                                                                                            |         |               |                                                |                      |                                                                                                                                                                                                      |
|-----|--------------------------------------------------------------------------------------------|---------|---------------|------------------------------------------------|----------------------|------------------------------------------------------------------------------------------------------------------------------------------------------------------------------------------------------|
| 155 | <i>Elephantopus scaber</i> L.                                                              | Herb    | Asteraceae    | Sahasrajari<br>(Nepali)<br>Muskur              | Roots                | Roots are used in pathogens over the wounds of animals (51). Used as sex stimulants in female animals (80). Plant is given to cattle to relieve from dysentery. Roots are used to purify blood (30). |
| 156 | <i>Elettaria cardamomum</i><br>(L) Maton                                                   | Herb    | Zingiberaceae |                                                | Seeds                | Used to treat blood in urine with other plants (27). Powder is made by crushing dry seeds and fed to animal to cure fever (26).                                                                      |
| 157 | <i>Eleusine coracana</i> (L.)<br>Gaertn.                                                   | Herb    | Poaceae       | Kodo (Nepali)                                  | Seeds                | Seeds are boiled in water and mixed with cornflour meal to cure chronic cough and any weakness (26).                                                                                                 |
| 158 | <i>Elsholtzia flava</i> Benth.                                                             | Herb    | Lamiaceae     | Ban silam<br>(Nepali)                          | Roots,<br>Leaves     | Roots or the leaf paste is applied to the affected parts to cure scabies in cattle (2).                                                                                                              |
| 159 | <i>Entada gigas</i> (L.) Fawc.<br>& Rendle<br><br><i>*Entada scandens</i> L.               | Climber | Fabaceae      | Pangra (Nepali)                                | Seeds                | Paste used as plaster to join the factured bones in cows (101).                                                                                                                                      |
| 160 | <i>Ephedra gerardiana</i><br>Wall. ex Klotzsch &<br>Garcke                                 | Shrub   | Ephedraceae   | Somlata (Nepali)                               | Stem                 | Used to treat cough (23).                                                                                                                                                                            |
| 161 | <i>Equisetum ramosissimum</i><br>Desf.<br><br><i>*Equisetum debile</i> Roxb.<br>ex Vaucher | Herb    | Equisetaceae  | Kurkure ghans<br>(Nepali), Migolja<br>(Tamang) | Whole<br>plant, Stem | Paste is applied over the dislocated bones of the cattle (4). Paste obtained from stem is applied externally on fractured bone (26).                                                                 |
| 162 | <i>Eragrostis nigra</i> Nees ex<br>Steud.                                                  | Herb    | Poaceae       | Phurke khar<br>(Nepali)                        | Whole<br>plant       | Plant is given as a nutritious feed (31).                                                                                                                                                            |
| 163 | <i>Erythrina arborescens</i><br>Roxb.                                                      | Tree    | Fabaceae      | Aejingo, Phaledo<br>(Nepali)                   | Bark                 | Extract is anthelmintic and skin abraison (41).                                                                                                                                                      |

|     |                                               |      |               |                                      |                           |                                                                                                                                                                                                                                                                                        |
|-----|-----------------------------------------------|------|---------------|--------------------------------------|---------------------------|----------------------------------------------------------------------------------------------------------------------------------------------------------------------------------------------------------------------------------------------------------------------------------------|
| 164 | <i>Erythrina stricta</i> Roxb.                | Tree | Fabaceae      | Phaledo (Nepali)                     | Leaves, Bark              | Leaf juice is given as vermifuge for cattle (52). Bark is soaked in water and applied over the body to treat scabies (26). Used to treat chronic disease of cattle (61). Bark juice used to treat wounds and foot and mouth diseases (29).                                             |
| 165 | <i>Eulaliopsis binata</i> (Retz.) C. E. Hubb. | Herb | Poaceae       | Babiyo (Nepali), Bankasi (Magar)     | Young leaves, whole plant | Used to cure weakness of cattle (91); plant is burnt and the ash with other ingredients is applied to treat cuts and wounds of domestic animals (90). Leaves are feed to cattle to treat indigestion (53). Grass is given raw to cure weakness (26).                                   |
| 166 | <i>Euphorbia hirta</i> L.                     | Herb | Euphorbiaceae |                                      | Whole plant               | Paste applied to treat wounds on shoulder of an ox or a buffalo, caused by yoke; it is also used for the wounds on the back of a horse (29).                                                                                                                                           |
| 167 | <i>Euphorbia royleana</i> Boiss.              | Tree | Euphorbiaceae | Seudi (Nepali), Desya (Tamang), Rijh | Stem, Sap                 | Plant juice is fed mixed with cattle's food to get rid of intestinal worms (4). Stem is roasted, cooled and given in blood dysentery (27). Milky juice is used to treat Corneal opacity or keratoconjunctivitis (28). Stem is roasted and given to elephants to control diarrhea (30). |
| 168 | <i>Euphorbia wallichii</i> Hook.f.            | Herb | Euphorbiaceae | Dhude jhar (Nepali)                  | Sap                       | Plant is poisonous to cattle (29).                                                                                                                                                                                                                                                     |
| 169 | <i>Fagopyrum esculentum</i> Moench            | Herb | Polygonaceae  | Phapar (Nepali)                      | Seeds                     | Seed flour used to treat cataract and retention of placenta (23).                                                                                                                                                                                                                      |

|     |                                                                                   |      |               |                                                           |                          |                                                                                                                                                                                                                                      |
|-----|-----------------------------------------------------------------------------------|------|---------------|-----------------------------------------------------------|--------------------------|--------------------------------------------------------------------------------------------------------------------------------------------------------------------------------------------------------------------------------------|
| 170 | <i>Fagopyrum megacarpum</i> Hara<br><br>* <i>Eskemukerjea megacarpum</i> H. Hara. | Herb | Polygonaceae  | Somlata (Nepali),<br>Kre (Tamang)                         | Leaves                   | Used in loss of appetite in cattle (121).<br>Leaves crushed with the roots of the <i>Rumex nepalensis</i> are prepared into paste and the paste is applied over the area of dislocated bone (4).                                     |
| 171 | <i>Falconeria insignis</i> Royle<br><br>* <i>Sapium insigne</i> (Royle) Trimen    | Tree | Euphorbiaceae | Khirro (Nepali),<br>Khalung (Tamang)                      | Roots,<br>Leaves,<br>Sap | Juice is given in case of stomach disorders of cattle (89) and to kill worms of horns of animals (111).                                                                                                                              |
| 172 | <i>Ficus auriculata</i> Lour.                                                     | Tree | Moraceae      | Nimaro (Nepali)                                           | Fruits                   | Given to cure the bleeding of cattle with urine locally called "laumate" (81,116).                                                                                                                                                   |
| 173 | <i>Ficus benghalensis</i> L.                                                      | Tree | Moraceae      | Bar (Nepali);<br>Bargad (Tharu),<br>Banyan tree (English) | Bark                     | Bark used for livestock worms (88,95,120). Juice used to treat diarrhea (29).                                                                                                                                                        |
| 174 | <i>Ficus neriifolia</i> Sm.                                                       | Tree | Moraceae      | Dhudhilo (Nepali)                                         | Bark,<br>Leaves          | Bark juice used to treat conjunctivitis; leaves are fed as a galactagogue (29).                                                                                                                                                      |
| 175 | <i>Ficus religiosa</i> L.                                                         | Tree | Moraceae      | Pipal (Nepali),<br>Pipar (Tharu)                          | Bark                     | Used in foot and mouth disease (27,40) and rheumatism (54). Used to treat blood in urine with other plants (27). Dry bark is ground to obtain powder and applied to the burn area (26). Bark is used to reduce fever in cattle (30). |
| 176 | <i>Ficus racemosa</i> L.<br><br>* <i>Ficus glomerata</i> Roxb.                    | Tree | Moraceae      | Khasreto (Nepali)                                         | Leaves                   | Ingested to livestock to ease the expulsion of placenta (101).                                                                                                                                                                       |
| 177 | <i>Ficus semicordata</i> Buch.-Ham. ex J. E Sm.                                   | Tree | Moraceae      | Khanyu (Nepali)                                           | Leaves                   | Leaves as fodder are given to remove the placenta (26,115).                                                                                                                                                                          |
| 178 | <i>Ficus</i> sp.                                                                  | Tree | Moraceae      | Bedulo (Nepali)                                           | Leaves                   | Forage acts as galactagogue (101).                                                                                                                                                                                                   |

|     |                                                                                  |       |               |                                                            |              |                                                                                                                                                                                                                                                                                                                                                             |
|-----|----------------------------------------------------------------------------------|-------|---------------|------------------------------------------------------------|--------------|-------------------------------------------------------------------------------------------------------------------------------------------------------------------------------------------------------------------------------------------------------------------------------------------------------------------------------------------------------------|
| 179 | <i>Foeniculum vulgare</i> Mill.                                                  | Herb  | Apiaceae      | Madhise sunp (Nepali)                                      | Leaves       | Used to treat indigestion/anorexia (23).                                                                                                                                                                                                                                                                                                                    |
| 180 | <i>Fragaria nubicola</i> Lindl.<br>* <i>Potentilla nubicola</i> (Hook. f.) Mabb. | Herb  | Rosaceae      | Bhuin ainselu (Nepali)                                     | Whole plant  | Used in foot and mouth disease of cattle (123).                                                                                                                                                                                                                                                                                                             |
| 181 | <i>Fraxinus floribunda</i> Wall.                                                 | Tree  | Oleaceae      | Lankuri (Nepali), Kipsil (Tamang), Himalayan ash (English) | Bark         | Used to treat stomach disorder, broken arms and legs of cattle (20). Juice extracted from the bark is given to treat the stomachache for the cattle (4). Bark is ground to make powder to cure diarrhea; paste is applied to treat broken legs and arms of animal (26). Juice is given to treat the stomach disorder of sheep, young shoots are toxic (31). |
| 182 | <i>Galium asperifolium</i> Wall.                                                 | Herb  | Rubiaceae     | Chitu (Nepali)                                             | Whole plant  | Juice is given for cataract of cattle, goats, etc. (121).                                                                                                                                                                                                                                                                                                   |
| 183 | <i>Gaultheria trichophylla</i> Royle                                             | Herb  | Ericaceae     | Nilo bhuikaphal (Nepali), Dabrami (Tamang)                 | Leaves       | Dried leaf powder is applied over the old wounds and to remove the worms from the wound (4)                                                                                                                                                                                                                                                                 |
| 184 | <i>Girardinia diversifolia</i> (Link) Friis                                      | Shrub | Urticaceae    | Allo (Nepali)                                              | Aerial parts | Nutritious for cows and buffaloes and increases milk production (77).                                                                                                                                                                                                                                                                                       |
| 185 | <i>Gonostegia hirta</i> (Blume) Miq.                                             | Herb  | Euphorbiaceae |                                                            | Whole plant  | Used to treat sprain and fracture (105).                                                                                                                                                                                                                                                                                                                    |
| 186 | <i>Grewia multiflora</i> Juss.                                                   | Tree  | Tiliaceae     | Phosre (Nepali)                                            | Leaves       | Fed as galactagogue (101).                                                                                                                                                                                                                                                                                                                                  |

|     |                                                                                                                                           |         |               |                                                  |                  |                                                                                                                                                                                                                                                                                                |
|-----|-------------------------------------------------------------------------------------------------------------------------------------------|---------|---------------|--------------------------------------------------|------------------|------------------------------------------------------------------------------------------------------------------------------------------------------------------------------------------------------------------------------------------------------------------------------------------------|
| 187 | <i>Gynandropsis gynandra</i> (L.) Briq.<br><br>* <i>Cleome gynandra</i> L.                                                                | Herb    | Cleomaceae    | Tori jhar (Nepali)                               | Leaves           | Paste applied to treat fresh wound of goat, sheep and other small animals (29).                                                                                                                                                                                                                |
| 188 | <i>Helicteres isora</i> L.                                                                                                                | Tree    | Malvaceae     | Pharsa (Nepali)                                  | Roots,<br>Leaves | Juice from roots and leaves are fed in the morning to cattle suffering from fever and from infections with roundworms (55). Root paste mixed with water is taken to treat worm infestations in livestock; large amounts of tender leaves are fed to livestock to treat worm infestations (44). |
| 189 | <i>Herpetospermum darjeelingense</i> (C. B. Clarke) H. Schaeff. & S. S. Renner                                                            | Climber | Cucurbitaceae | Jangali karela (Nepali),<br>Tangsarkato (Tamang) | Seeds            | Pounded seeds are mixed with corn flour and are fed to the cattle to relieve the fever (4).                                                                                                                                                                                                    |
| 190 | <i>Heterodermia diademata</i> (Taylor) D.D. Awasthi                                                                                       | Lichen  | Physciaceae   |                                                  | Whole plant      | Powdered and applied externally on fresh cuts and wounds (125).                                                                                                                                                                                                                                |
| 191 | <i>Hibiscus sabdariffa</i> L.                                                                                                             | Shrub   | Malvaceae     |                                                  | Fruits           | Infusion given to treat diarrhea and dysentery (69).                                                                                                                                                                                                                                           |
| 192 | <i>Hippolytia dolichophylla</i> (Kitam.) K. Bremer & Humphries<br><br>* <i>Tanacetum dolichophyllum</i> (Kitam.) Kitam. ex Kitam. & Gould | Herb    | Asteraceae    |                                                  | Roots            | Roots given in indigestion (23).                                                                                                                                                                                                                                                               |
| 193 | <i>Hippophae salicifolia</i> D. Don                                                                                                       | Shrub   | Elaeagnaceae  | Chugo (Nepali)                                   | Fruits           | Fruits used as anthelmintic (3,23).                                                                                                                                                                                                                                                            |

|     |                                                                                                                                           |      |             |                                                                           |                          |                                                                                                                                                                              |
|-----|-------------------------------------------------------------------------------------------------------------------------------------------|------|-------------|---------------------------------------------------------------------------|--------------------------|------------------------------------------------------------------------------------------------------------------------------------------------------------------------------|
| 194 | <i>Holarrhena pubescens</i><br>(Buch.-Ham.) Wall. ex G.<br>Don                                                                            | Tree | Apocynaceae | Indrajau (Nepali)                                                         | Bark                     | Plant used as veterinary medicine (39).<br>Decoction obtained from bark is given to<br>the livestock to treat constipation, diarrhea,<br>and dysentery (26).                 |
| 195 | <i>Hordeum vulgare</i> L.                                                                                                                 | Herb | Poaceae     |                                                                           | Young<br>leaves,<br>Seed | New leaves are crushed to obtain juice and<br>used to cure eye-related problems; seeds<br>are boiled in water and the oily material is<br>fed orally to treat mastitis (26). |
| 196 | <i>Houttuynia cordata</i><br>Thunb.                                                                                                       | Herb | Saururaceae | Gane (Nepali)                                                             | Whole<br>plant           | Juice of plant is put in the wounds of cattle<br>to kill worms and to hasten the healing.<br>18).                                                                            |
| 197 | <i>Hydrocotyle</i><br><i>sibthorpioides</i> Lam.<br><br>* <i>Hydrocotyl</i> sp.                                                           | Herb | Apiaceae    | Khochade, Sano<br>ghortapre, Zupha<br>Hathi paila, timir<br>jhar (Nepali) | Leaves                   | Juice is given to livestock for urinary<br>problems (88).                                                                                                                    |
| 198 | <i>Hymenidium benthamii</i><br>(Wall. ex DC.) Pimenov<br>& Kljuykov<br><br>* <i>Pleurospermum</i><br><i>benthamii</i> (DC.)<br>C.B.Clarke | Herb | Apiaceae    | Ganyaino<br>(Nepali)                                                      | Roots                    | Used in colic (23).                                                                                                                                                          |
| 199 | <i>Hymenidium dentatum</i><br>(Wall. ex DC.) Pimenov<br>& Kljuykov<br><br>* <i>Pleurospermum</i><br><i>dentatum</i> (DC.) C. B.<br>Clarke | Herb | Apiaceae    |                                                                           | Whole<br>plant           | Mixed with other plant and juice is given<br>to treat animals suffering from asthma<br>(122).                                                                                |

|     |                                                                                                 |         |                |                                      |                           |                                                                                                                                                                          |
|-----|-------------------------------------------------------------------------------------------------|---------|----------------|--------------------------------------|---------------------------|--------------------------------------------------------------------------------------------------------------------------------------------------------------------------|
| 200 | <i>Hypericum cordifolium</i> Choisy                                                             | Shrub   | Hypericaceae   | Areto (Nepali)                       | Leaves                    | Tender leaves are poisonous to cattle (86).                                                                                                                              |
| 201 | <i>Ichnocarpus frutescens</i> (L.) W. T. Aiton                                                  | Shrub   | Apocynaceae    | Khegar dhudi (Tharu)                 | Leaves                    | Fed to animal as galactagogue (47).                                                                                                                                      |
| 202 | <i>Ilex dipyrena</i> Wall.                                                                      | Tree    | Aquifoliaceae  | Seto khasru (Nepali), Bomsu (Tamang) | Leaves                    | Fresh leaves are fed to the cattle to enhance the secretion of milk and to increase strength and vigor (4).                                                              |
| 203 | <i>Impatiens scabrida</i> DC.                                                                   | Herb    | Balsaminaceae  | Phatakya (Nepali)                    | Whole plant               | Plant is given to treat the fever (31).                                                                                                                                  |
| 204 | <i>Imperata cylindrica</i> (L.) P.Beauv.                                                        | Herb    | Poaceae        | Siru (Nepali)                        | Aerial parts, Roots       | Plant is used for fodder purposively to kill worms and to treat diarrhea in cattle and goats (73). Roots are crushed to make a paste and used to cure endoparasite (26). |
| 205 | <i>Ipomoea himalayana</i> J. R. I. Wood & Scotland<br><br>* <i>Argyreia hookeri</i> C.B. Clarke | Climber | Convolvulaceae | Suntiki laharo (Nepali)              | Whole plant               | Tied externally circling the stomach of an animal to expel placenta (28).                                                                                                |
| 206 | <i>Jatropha gossypifolia</i> L.                                                                 | Shrub   | Euphorbiaceae  | Rato sajun (Nepali)                  | Roots                     | Paste applied to treat dislocated bones, decoction is given for the same (29).                                                                                           |
| 207 | <i>Juglans regia</i> L. var. <i>kamaonia</i> C. DC.                                             | Tree    | Juglandaceae   | Okhar (Nepali)                       | Bark                      | Paste with another plant is applied to broken and dislocated bones for animals, particularly goats (122).                                                                |
| 208 | <i>Juniperus recurva</i> Buch.-Ham. ex D. Don                                                   | Tree    | Cupressaceae   | Dhupi (Nepali)                       | Leaves                    | Used to treat external parasites (23).                                                                                                                                   |
| 209 | <i>Justicia adhatoda</i> L.                                                                     | Shrub   | Acanthaceae    | Asuro (Nepali)                       | Whole plant, Leaf, Flower | Decoction prepared from the whole plant is given to cure of common cold (26). Leaf                                                                                       |

|     |                                                                                        |      |               |                                              |                             |                                                                                                                                                                                                                                                                                                                                             |
|-----|----------------------------------------------------------------------------------------|------|---------------|----------------------------------------------|-----------------------------|---------------------------------------------------------------------------------------------------------------------------------------------------------------------------------------------------------------------------------------------------------------------------------------------------------------------------------------------|
|     |                                                                                        |      |               |                                              |                             | and flower paste used to treat cough and bronchitis (29).                                                                                                                                                                                                                                                                                   |
| 210 | <i>Justicia pectinata</i> L.<br><br>* <i>Rungia pectinata</i> (L.)<br>Nees             | Herb | Acanthaceae   |                                              | Stem                        | Stem piece tied on body of goat to ease delivery (65).                                                                                                                                                                                                                                                                                      |
| 211 | <i>Kalanchoe spathulata</i><br>DC.                                                     | Herb | Crassulaceae  | Ajamari jhar<br>(Nepali)                     | Stem,<br>Leaves             | Plant is poisonous to cattle (29,96).                                                                                                                                                                                                                                                                                                       |
| 212 | <i>Lecanthus peduncularis</i><br>(Wall. ex Royle) Wedd.                                | Herb | Urticaceae    | Gakaleti<br>(Nepali), Tilo<br>(Tamang)       | Aerial parts                | Fresh plant is fed to cattle to stimulate the secretion of milk (4,31).                                                                                                                                                                                                                                                                     |
| 213 | <i>Lens culinaris</i> Medik                                                            | Herb | Fabaceae      | Masuro (Nepali)                              | Seeds                       | Cooked with maize flour and given to animal twice a day to increase milk production (26).                                                                                                                                                                                                                                                   |
| 214 | <i>Leonurus japonicus</i><br>Houtt.                                                    | Herb | Lamiaceae     | Chhotka bakain<br>(Batar)                    | Leaves                      | Used in constipation and tiredness (40).                                                                                                                                                                                                                                                                                                    |
| 215 | <i>Lepisorus mehrae</i><br>Fraser-Jenk.                                                | Fern | Polypodiaceae |                                              | Rhizomes                    | Powder used to treat diarrhea and wound on mouth (108).                                                                                                                                                                                                                                                                                     |
| 216 | <i>Leucas lavandulifolia</i> Sm.<br><br>* <i>Leucas indica</i> (L.) R. Br.<br>ex Vatke | Herb | Lamiaceae     | Dhulphe jhar<br>(Nepali), Dulpha<br>(Bantar) | Leaves                      | Used in urinary problems (stopped urination) (40) and as laxative (54). Juice given in flatulence (27).                                                                                                                                                                                                                                     |
| 217 | <i>Lindera neesiana</i><br>(Wall.ex Nees) Kurz.                                        | Tree | Lauraceae     | Siltimur (Nepali)                            | Fruits,<br>Seeds,<br>Leaves | Fruits used to treat animal diseases (85), diarrhea (80). Seeds are given to check diarrhoea and dysentery (4). When cattle eat poisonous plants, dry fruits given (31,73), and also to remove placenta during delivery (73). Fruit juice is given to cure any weakness (26). Fruit juice is used to treat stomach disorder of livestock if |



|     |                                                                                    |       |             |                                        |             |                                                                                                                                                                                                                                                                                                                                                                                                      |
|-----|------------------------------------------------------------------------------------|-------|-------------|----------------------------------------|-------------|------------------------------------------------------------------------------------------------------------------------------------------------------------------------------------------------------------------------------------------------------------------------------------------------------------------------------------------------------------------------------------------------------|
|     |                                                                                    |       |             |                                        |             | they eat poisonous plants (106). Fruits medicinal (108). Leaves grinded and given to treat animal disorders (109). Powder or paste is given to treat indigestion (112). Fruits used to remove lice and other ectoparasites (29).                                                                                                                                                                     |
| 218 | <i>Linum usitatissimum</i> L.                                                      | Herb  | Linaceae    | Aalus (Nepali)                         | Seeds       | <i>Linum usitatissimum</i> and <i>Sesamum indicum</i> are fried and crushed to make powder. It is then fed orally to cure mastitis. Similarly, powder obtained from dried seed of <i>Linum usitatissimum</i> , <i>Sesamum indicum</i> and <i>Trachyspermum ammi</i> are mixed and fed with cornflour twice a day to increase milk production (26). Used to treat gastritis and cough and cold (105). |
| 219 | <i>Litsea cubeba</i> (Lour.) Pers.                                                 | Tree  | Lauraceae   | Siltimur (Nepali)                      | Seeds       | Seeds used in colic (23).                                                                                                                                                                                                                                                                                                                                                                            |
| 220 | <i>Litsea doshia</i> (D. Don) Kosterm.                                             | Tree  | Lauraceae   |                                        | Leaves      | Fed to treat sicknesses (109).                                                                                                                                                                                                                                                                                                                                                                       |
| 221 | <i>Luculia gratissima</i> (Wall.) Sweet                                            | Shrub | Rubiaceae   | Ban kangiyo (Nepali), Somrati (Tamang) | Bark        | Juice is used to remove worms inside the stomach of cattle (4,31,96).                                                                                                                                                                                                                                                                                                                                |
| 222 | <i>Luisia tristis</i> (G. Forst.) Hook. F.<br><br>* <i>Luisia zeylanica</i> Lindl. | Herb  | Orchidaceae |                                        | Leaves      | Juice used to treat wounds in cattle (31,70).                                                                                                                                                                                                                                                                                                                                                        |
| 223 | <i>Lygodium flexuosum</i> (L.) Sw.                                                 | Fern  | Lygodiaceae |                                        | Whole plant | Used as veterinary medicine (39).                                                                                                                                                                                                                                                                                                                                                                    |

|     |                                                                                            |       |               |                                                                                                  |                           |                                                                                                                                                                             |
|-----|--------------------------------------------------------------------------------------------|-------|---------------|--------------------------------------------------------------------------------------------------|---------------------------|-----------------------------------------------------------------------------------------------------------------------------------------------------------------------------|
| 224 | <i>Lyonia ovalifolia</i> (Wall.)<br>Drude                                                  | Tree  | Ericaceae     | Angeri (Nepali)                                                                                  | Leaves                    | Young leaves are smeared, or their juice applied regularly to the affected part to treat scabies in cattle (2). Young leaves are poisonous to cattle (1,48,29, 85,101,118). |
| 225 | <i>Lysimachia arvensis</i><br>subsp. <i>arvensis</i><br><br>* <i>Anagallis arvensis</i> L. | Herb  | Primulaceae   | Armale                                                                                           | Whole plant               | Plant juice used to remove leeches (29).                                                                                                                                    |
| 226 | <i>Maesa chisia</i> Buch.-Ham.<br>ex D. Don                                                | Shrub | Primulaceae   | Bilauni (Nepali)                                                                                 | Fruits,<br>Leaves         | Fruits are given to sterile female buffalo/cow (97). Plant used as veterinary medicine (39). Leaves are given to increase secretion of milk (31).                           |
| 227 | <i>Maesa macrophylla</i> Wall.<br>ex Roxb.                                                 | Shrub | Myrsinaceae   | Bhogte<br>(Danuwar)                                                                              | Fruits                    | Juice given to treat haemorrhagic septicemia of animals (46) and diphtheria of cattle (31).                                                                                 |
| 228 | <i>Mallotus philippensis</i><br>(Lam.) Muell. Arg.                                         | Tree  | Euphorbiaceae | Sindhure,<br>Kamala, Rohini<br>(Nepali),<br>Kampillak,<br>Rugnang (Raji);<br>Pyongla<br>(Tamang) | Bark,<br>seeds,<br>fruits | Used to cure gastric trouble of cattle (91).                                                                                                                                |
| 229 | <i>Malva kashmiriana</i> Alef.<br><br>* <i>Lavatera cachemiriana</i><br>Cambess.           | Herb  | Malvaceae     | Majaino (Nepali)                                                                                 | Leaves                    | Used to treat agalactia (23).                                                                                                                                               |
| 230 | <i>Malva verticillata</i> L.                                                               | Herb  | Malvaceae     | Laphe saag<br>(Nepali)                                                                           | Whole plant               | Plant is boiled and given to cattle for fast expulsion of placenta (3).                                                                                                     |

|     |                                                                                         |         |               |                                                                                                                                            |                            |                                                                                                                                                                                                                                                                                                                                                                                                                                                                                                                                                                                |
|-----|-----------------------------------------------------------------------------------------|---------|---------------|--------------------------------------------------------------------------------------------------------------------------------------------|----------------------------|--------------------------------------------------------------------------------------------------------------------------------------------------------------------------------------------------------------------------------------------------------------------------------------------------------------------------------------------------------------------------------------------------------------------------------------------------------------------------------------------------------------------------------------------------------------------------------|
| 231 | <i>Mangifera indica</i> L.                                                              | Tree    | Anacardiaceae | Aanp (Nepali)                                                                                                                              | Bark,<br>Fruits            | Bark used to treat urinary problems (40). Paste of dried unripe fruits is given to cattle as an antidote (48). Used to treat eye problems (80). Bark is dried then ground with camphor and applied to the burn area (26).                                                                                                                                                                                                                                                                                                                                                      |
| 232 | <i>Marsdenia tenacissima</i> (Roxb.) Moon                                               | Climber | Apocynaceae   | Bilajor (Nepali)                                                                                                                           | Root                       | Paste is applied on swelling bone area (26).                                                                                                                                                                                                                                                                                                                                                                                                                                                                                                                                   |
| 233 | <i>Medicago sativa</i> L.                                                               | Herb    | Fabaceae      | Kosheghans (Nepali)                                                                                                                        | Leaves                     | Enhance metabolism and increase milk production in livestock (60).                                                                                                                                                                                                                                                                                                                                                                                                                                                                                                             |
| 234 | <i>Melia azedarach</i> L.                                                               | Tree    | Meliaceae     | Bakaino (Nepali);<br>Aristha, Nimbah (Sanskrit),<br>Chanyal (Tamang),<br>Bakain (Tharu);<br>Bokom bana (Satar); Persian<br>lilac (English) | Fruits,<br>Leaves,<br>Bark | Fruits are useful in <i>tila pareko</i> of cattle (128). Decoction from leaves is fed to treat intestinal worms (27). Bark and leaves juice fed to treat intestinal worms (28). Seeds and leaves are crushed to make juice. It is applied by mixing with turmeric and salt to cure ectoparasite; <i>Melia azedarach</i> , <i>Azadirachta indica</i> , and <i>Artemisia indica</i> are taken and cut into pieces. It is cooked with cornflour then feed to treat endoparasite; Seed and leaf are crushed to make a paste and applied to cure wound by mixing with camphor (26). |
| 235 | <i>Mesosphaerum suaveolens</i> (L.) Kuntze<br><br>* <i>Hyptis suaveolens</i> (L.) Poit. | Herb    | Lamiaceae     | Ban bawari (Nepali)                                                                                                                        | Leaves                     | Juice is dropped to treat conjunctivitis (29).                                                                                                                                                                                                                                                                                                                                                                                                                                                                                                                                 |

|     |                                         |         |               |                         |                     |                                                                                                                                                                                                                                                                                                                                           |
|-----|-----------------------------------------|---------|---------------|-------------------------|---------------------|-------------------------------------------------------------------------------------------------------------------------------------------------------------------------------------------------------------------------------------------------------------------------------------------------------------------------------------------|
| 236 | <i>Millettia extensa</i> (Benth.) Baker | Shrub   | Fabaceae      | Gaujo (Nepali)          | Roots, Leaves       | Used to get rid of lice from cattle (96). Leaves are used to treat lice and worms (56). Plant used as veterinary medicine (39). Roots are used in ticks and mites of cattle (51). Plant juice used to treat scabies (28). Root decoction applied on cattle's sore (67). Leaf juice used to treat lice or any other ectoparasites (29,31). |
| 237 | <i>Mimosa pudica</i> L.                 | Herb    | Fabaceae      | Lajjawati jhar (Nepali) | Whole plant         | Fed to cure uterus prolapse (26). Used as galactagogue (101).                                                                                                                                                                                                                                                                             |
| 238 | <i>Mentha arvensis</i> L.               | Herb    | Lamiaceae     | Pudina (Nepali)         | Leaves, Whole plant | Fed with <i>Allium sativum</i> to cure diarrhea (26). The whole plant is rubbed into the body of the animal to cure ectoparasite (26).                                                                                                                                                                                                    |
| 239 | <i>Mirabilis jalapa</i> L.              | Herb    | Nyctaginaceae | Lankeshwori (Nepali)    | Roots               | Juice used to treat urinary disorders (28).                                                                                                                                                                                                                                                                                               |
| 240 | <i>Moringa oleifera</i> Lam.            | Shrub   | Moringaceae   | Setakchini (Nepali)     | Roots, Bark         | Root juice used to treat wounds (69). Bark decoction given as diuretic (27).                                                                                                                                                                                                                                                              |
| 241 | <i>Morus alba</i> L.                    | Tree    | Moraceae      | Kimbu (Nepali)          | Latex               | Used as anthelmintic for cattle (75).                                                                                                                                                                                                                                                                                                     |
| 242 | <i>Morus australis</i> Poir.            | Tree    | Moraceae      | Ban kimbu (Nepali)      | Roots               | Fresh root is crushed to make a paste and fed to animal for treating endoparasite (26).                                                                                                                                                                                                                                                   |
| 243 | <i>Mucuna pruriens</i> (L.) DC.         | Climber | Fabaceae      | Kauso (Nepali)          | Leaves              | Given to animals in case of snake bite (22).                                                                                                                                                                                                                                                                                              |
| 244 | <i>Murraya koenigii</i> (L.) Sprengel   | Shrub   | Rutaceae      | Karipatta (Nepali)      | Leaves              | Used to treat lice, ticks and mites of cattle (51).                                                                                                                                                                                                                                                                                       |

|     |                                                                                     |      |               |                                     |                 |                                                                                                                                                                                                                                                                                                     |
|-----|-------------------------------------------------------------------------------------|------|---------------|-------------------------------------|-----------------|-----------------------------------------------------------------------------------------------------------------------------------------------------------------------------------------------------------------------------------------------------------------------------------------------------|
| 245 | <i>Musa paradisiaca</i> L.                                                          | Herb | Musaceae      | Kera (Nepali)                       | Root/Stem       | Juice given as diuretic (27). Ripen banana is given to treat mastitis (26). Juice of the plant is given to cattle to induce urination (30).                                                                                                                                                         |
| 246 | <i>Myristica fragrans</i> Houtt.                                                    | Tree | Myristicaceae | Jaifal (Nepali)                     | Seeds           | Powder is obtained from seeds of this plant, <i>Trachyspermum ammi</i> , and <i>Sesamum indicum</i> then fed to cure chronic cough, constipation. Solely it is given to increase milk production and urinary problems (26).                                                                         |
| 247 | <i>Nastus borbonicus</i><br>J.F.Gmel.<br><br>* <i>Bambusa arundinacea</i><br>Bonpl. | Tree | Poaceae       |                                     | Leaves          | Fresh leaves fed to cattle for placental retention with quicker parturition (27).                                                                                                                                                                                                                   |
| 248 | <i>Nicotiana tabacum</i> L.                                                         | Herb | Solanaceae    | Surti (Nepali)                      | Leaves,<br>Bark | Paste is used to remove lice (106) and to cure skin diseases of cattle (98). Juice applied to kill and remove leeches from the nose of cattle (75). Leaves used to treat germs and wounds (40) and external parasites (23). Bark decoction used to treat fever; paste is used to treat wounds (29). |
| 249 | <i>Nyctanthes arbor-tristis</i><br>L.                                               | Tree | Oleaceae      |                                     | Fruits          | Used in foot and mouth disease (40).                                                                                                                                                                                                                                                                |
| 250 | <i>Ocimum basilicum</i> L.                                                          | Herb | Lamiaceae     | Palhas (Bantar),<br>Babari (Nepali) | Leaves          | Used to treat germs and wounds (40).                                                                                                                                                                                                                                                                |
| 251 | <i>Ocimum tenuiflorum</i> L.<br><br>* <i>Ocimum sanctum</i> L.                      | Herb | Lamiaceae     | Tulsi (Nepali)                      | Leaves          | Used to treat cough (23). Leaf paste is applied externally to healing wounds (26).                                                                                                                                                                                                                  |

|     |                                                                                                                                       |        |                      |                                                          |                                |                                                                                                                                                                                                                                                            |
|-----|---------------------------------------------------------------------------------------------------------------------------------------|--------|----------------------|----------------------------------------------------------|--------------------------------|------------------------------------------------------------------------------------------------------------------------------------------------------------------------------------------------------------------------------------------------------------|
| 252 | <i>Ophiocordyceps sinensis</i> (Berk.) G.H. Sung, J.M. Sung, Hywel-Jones & Spatafora<br><br>* <i>Cordyceps sinensis</i> (Berk.) Sacc. | Fungus | Ophiocordycipitaceae |                                                          | Whole body parts               | Given to cattle as tonic and aphrodisiac (116).                                                                                                                                                                                                            |
| 253 | <i>Oreocnide frutescens</i> (Thunb.) Miq.                                                                                             | Shrub  | Urticaceae           | Pleta (Gurung)                                           | Roots                          | Juice is given to cattle to clear the stool (31).                                                                                                                                                                                                          |
| 254 | <i>Oreoseris gossypina</i> (Royle) X. D. Xu & V. A. Funk<br><br>* <i>Gerbera gossypina</i> (Royle) Beauv.                             | Herb   | Asteraceae           |                                                          | Roots                          | Used to treat internal parasite (Liver fluke, worms) (23).                                                                                                                                                                                                 |
| 255 | <i>Oroxylum indicum</i> (L.) Kurz                                                                                                     | Tree   | Bignoniaceae         | Tatahalo (Nepali)                                        | Bark, Seeds                    | Bark of this plant with <i>Schima wallichii</i> are dried, then grounded to obtain powder, and fed to cure diarrhea (26). Fresh leaves and seeds are grounded to make a paste, and fed to cure urinary problem (26). Paste used to treat wounds (29).      |
| 256 | <i>Osbeckia stellata</i> Buch.-Ham. ex D. Don                                                                                         | Shrub  | Melastomataceae      | Angaru, Anger, Asare phul (Nepali), Mendorumrum (Tamang) | Roots, Flowers, Leaves, Fruits | Paste is prepared from the roots and flowers and is applied over the swellings of the dislocated bone (4). A decoction of the leaf and fruit twice a day is given to domestic animals for any kind of weakness (26). Root decoction is antipoisoinng (31). |
| 257 | <i>Osyris quadripartita</i> Salzmann ex Decne.                                                                                        | Shrub  | Santalaceae          |                                                          | Leaves                         | Young leaves are poisonous for goat (99).                                                                                                                                                                                                                  |

|     |                                                                           |         |               |                                          |                     |                                                                                                                                                                                                                                                                                                                                                                                                                                                                                |
|-----|---------------------------------------------------------------------------|---------|---------------|------------------------------------------|---------------------|--------------------------------------------------------------------------------------------------------------------------------------------------------------------------------------------------------------------------------------------------------------------------------------------------------------------------------------------------------------------------------------------------------------------------------------------------------------------------------|
| 258 | <i>Osyris wightiana</i> Wall. ex Wight                                    | Shrub   | Santalaceae   | Nun dhiki (Nepali)                       | Bark, Leaves        | Dried bark is crushed to make powder and fed to cure joint swelling (26). Leaves are poisonous; bark juice is used to treat indigestion (29).                                                                                                                                                                                                                                                                                                                                  |
| 259 | <i>Oxalis corniculata</i> L.                                              | Herb    | Oxalidaceae   | Chariamilo (Nepali), Nakhrupang (Tamang) | Whole plant, Leaves | Plant juice is dropped inside to treat earache of cattle (70). Plant used as veterinary medicine (39). Extract of the fresh leaves is applied over the boils of the domestic cattle (4). Juice used to treat eye complaint (27,31). Juice obtained by pounding fresh leaves is dropped into the eyes for any eye problems (26). Fresh extract leaves is applied to eyes of the domestic cattles to cure eye problem (30). Plant juice is used to treat muscular swelling (31). |
| 260 | <i>Oxyria digyna</i> (L.) Hill                                            | Herb    | Polygonaceae  | Ragatmudo (Nepali)                       | Whole plant         | Used in swelling/internal wound (23).                                                                                                                                                                                                                                                                                                                                                                                                                                          |
| 261 | <i>Papilionanthe teres</i> (Roxb.) Schltr.<br>* <i>Vanda teres</i> Lindl. | Herb    | Orchidaceae   |                                          | Whole plant         | Paste is applied to treat dislocated bones of cattle (45).                                                                                                                                                                                                                                                                                                                                                                                                                     |
| 262 | <i>Paris polyphylla</i> Sm.                                               | Herb    | Melanthiaceae | Satuwa (Nepali)                          | Roots, Rhizomes     | Used as antidote (99). Root juice is given as an anthelmintic (4). Pieces of root fed with cattle feed to treat diarrhea (107). Roots medicinal (108).                                                                                                                                                                                                                                                                                                                         |
| 263 | <i>Parthenocissus semicordata</i> (Wall.) Planch.                         | Climber | Vitaceae      | Charchare lahara (Nepali)                | Aerial parts        | Given to increase lactation and appetite (29).                                                                                                                                                                                                                                                                                                                                                                                                                                 |

|     |                                                                                                                           |      |                |                                                |                      |                                                                                                                                                                                                                        |
|-----|---------------------------------------------------------------------------------------------------------------------------|------|----------------|------------------------------------------------|----------------------|------------------------------------------------------------------------------------------------------------------------------------------------------------------------------------------------------------------------|
| 264 | <i>Persicaria chinensis</i> (L.)<br>H. Gross                                                                              | Herb | Polygonaceae   | Kukur thotne<br>(Nepali)                       | Whole<br>plant       | Used as diuretic (80).                                                                                                                                                                                                 |
| 265 | <i>Persicaria<br/>hydropiper</i> (L.) Spach                                                                               | Herb | Polygonaceae   | Pirre (Nepali)                                 | Aerial parts         | Juice is given to treat worms for cattle<br>(57). Paste is given as anthelmintic (29).                                                                                                                                 |
| 266 | <i>Persicaria<br/>nepalensis</i> (Meisn.) H.<br>Gross                                                                     | Herb | Polygonaceae   | Raune (Nepali)                                 | Whole<br>plant       | Plants are poisonous to cattle (119).                                                                                                                                                                                  |
| 267 | <i>Persicaria wallichii</i><br>Greuter & Burdet                                                                           | Herb | Polygonaceae   | Ratnaule<br>(Nepali),<br>Yapenguin<br>(Tamang) | Tender<br>parts      | Fresh tender parts are given to cattle to<br>enhance the secretion of milk (4).                                                                                                                                        |
| 268 | <i>Phyla nodiflora</i> (L.)<br>Greene<br><br>* <i>Lippia nodiflora</i> (L.)<br>Michx.                                     | Herb | Verbenaceae    |                                                | Roots                | Paste used to treat wounds, used to treat<br>bone dislocation (29).                                                                                                                                                    |
| 269 | <i>Phyllanthus emblica</i> L.                                                                                             | Tree | Phyllanthaceae | Amala (Nepali)                                 | Leaves and<br>fruits | Paste is made by crushing leaves and fruit<br>and applied to the burn area (26).                                                                                                                                       |
| 270 | <i>Picrorhiza<br/>scrophulariiflora</i> Pennell<br><br>* <i>Neopicrorhiza<br/>scrophulariiflora</i> (Pennel)<br>D.Y. Hong | Herb | Plantaginaceae | Kutki (Nepali),<br>Hodling<br>(Sanskrit)       | Roots                | Paste is used to heal the wounds of cattle<br>(2). Mixed with other plant and juice is<br>given to treat animals suffering from<br>asthma (122). Roots used in internal<br>parasites/cough (respiratory problem) (23). |
| 271 | <i>Pieris formosa</i> (Wall.) D.<br>Don                                                                                   | Tree | Ericaceae      | Lekh angeri<br>(Nepali)                        | Leaves               | Plant is poisonous to cattle (1). Leaf paste<br>applied to treat scabies, leaves are<br>poisonous (29).                                                                                                                |
| 272 | <i>Pinus roxburghii</i> Sarg.                                                                                             | Tree | Pinaceae       | Sallo (Nepali)                                 | Latex                | Latex is mixed with mustard oil and<br>applied to wound skin (26).                                                                                                                                                     |



|     |                                                                                                    |         |                |                                             |                     |                                                                                                                                                                                                                                                                                    |
|-----|----------------------------------------------------------------------------------------------------|---------|----------------|---------------------------------------------|---------------------|------------------------------------------------------------------------------------------------------------------------------------------------------------------------------------------------------------------------------------------------------------------------------------|
|     |                                                                                                    |         |                |                                             |                     |                                                                                                                                                                                                                                                                                    |
| 273 | <i>Pinus wallichiana</i><br>A.B.Jackson                                                            | Tree    | Pinaceae       | Gobre sallo<br>(Nepali)                     | Resin, stem         | Resin/stem used in sprain/internal pain (23).                                                                                                                                                                                                                                      |
| 274 | <i>Piper longum</i> L.                                                                             | Climber | Piperaceae     | Pipair (Batar),<br>Pipla (Nepali)           | Leaves              | Used to treat constipation and tiredness (40).                                                                                                                                                                                                                                     |
| 275 | <i>Piper nigrum</i> L.                                                                             | Climber | Piperaceae     | Marich (Nepali)                             | Fruits,<br>Rhizomes | Fruits used to treat cataract (23). Rhizome paste of this plant with <i>Zingiber officinale</i> and <i>Acorus calamus</i> is given in fever (27). Fruits powder used to treat chronic cough (27). Powder is prepared and blown to the eye gently to cure eye-related problem (26). |
| 276 | <i>Piptanthus nepalensis</i><br>(Hook.) D. Don                                                     | Shrub   | Fabaceae       | Jhyan (Nepali)                              | Leaves              | Juice applied to treat wounds in hoof (29).                                                                                                                                                                                                                                        |
| 277 | <i>Plantago centralis</i> Pilg.<br>* <i>Plantago erosa</i> Wall.                                   | Herb    | Plantaginaceae | Isabgol (Nepali),<br>Aitanjhar<br>(Tamang)  | Whole<br>plant      | Extract of whole plant is used for antiseptic dressings (4).                                                                                                                                                                                                                       |
| 278 | <i>Plantago major</i> L.                                                                           | Herb    | Plantaginaceae |                                             | Roots               | Used as anthelmintic (115).                                                                                                                                                                                                                                                        |
| 279 | <i>Platostoma hispidum</i> (L.)<br>A.J.Paton<br>* <i>Acrocephalus indicus</i><br>(Burm. f.) Kuntze | Herb    | Lamiaceae      |                                             | Whole<br>plant      | Plant used as veterinary medicine (39).                                                                                                                                                                                                                                            |
| 280 | <i>Pleione humilis</i> (Sm.) D.<br>Don                                                             | Herb    | Orchidaceae    | Bhuisungava<br>(Nepali),<br>Ghabeto (Magar) | Bulb                | Used as galactagogue for livestock (88).                                                                                                                                                                                                                                           |

|     |                                                                                        |      |                |                         |                               |                                                                                                                                                                                                                                                                                                                                                                                                                                                  |
|-----|----------------------------------------------------------------------------------------|------|----------------|-------------------------|-------------------------------|--------------------------------------------------------------------------------------------------------------------------------------------------------------------------------------------------------------------------------------------------------------------------------------------------------------------------------------------------------------------------------------------------------------------------------------------------|
| 281 | <i>Plumbago zeylanica</i> L.                                                           | Herb | Plumbaginaceae | Chit                    | Roots,<br>Seeds               | Juice to treat falling of hairs, paste is given in case of diarrhea (29). Root paste is given orally to reduce effects of snake and scorpion bites. Paste of seeds is given in stomach pain (30).                                                                                                                                                                                                                                                |
| 282 | <i>Pogostemon benghalensis</i> (Burm. f.) Kuntze                                       | Herb | Lamiaceae      | Rudilo (Nepali), Utajar | Leaves,<br>Flowers,<br>shoots | Juice is mixed with old about a year cow-dung and given to cattle to control dysentery (31,58). Plant used in veterinary medicine (39). Leaf and flower are dried in sun. Powder is prepared by crushing them and fed to cure diarrhea (26). Leaf and flower are crushed to make a paste, and applied to cure a wound (26). Boiled and given in case of cough and bronchitis (29). Paste of fresh shoots is applied to wounds and bandaged (30). |
| 283 | <i>Polyalthia longifolia</i> (Sonn.) Thwaites                                          | Tree | Annonaceae     |                         | Leaves                        | Paste applied in eye problem of cattle (19).                                                                                                                                                                                                                                                                                                                                                                                                     |
| 284 | <i>Polygonatum verticillatum</i> (L.) All.                                             | Herb | Asparagaceae   |                         | Roots                         | Paste given to dogs as a health tonic in debility (31).                                                                                                                                                                                                                                                                                                                                                                                          |
| 285 | <i>Polygonum</i> sp.                                                                   | Herb | Polygonaceae   |                         | Young shoots                  | Used to cure dysentery (115).                                                                                                                                                                                                                                                                                                                                                                                                                    |
| 286 | <i>Portulaca oleracea</i> L.                                                           | Herb | Portulacaceae  | Nona, Nunia             | Leaves                        | Decoction of leaf is given to cattle to stop urinal bleeding, improves urination (30).                                                                                                                                                                                                                                                                                                                                                           |
| 287 | <i>Potentilla indica</i> (Andr.) Wolf<br><br>* <i>Duchesnea indica</i> (Andrews) Focke | Herb | Rosaceae       | Bhui Kaphal (Nepali)    | Roots                         | Fed to treat colic in cattle (81).                                                                                                                                                                                                                                                                                                                                                                                                               |

|     |                                                                          |       |           |                               |                  |                                                                                                                                                                                                                                                                                                                                                                                                                                                                                                                                             |
|-----|--------------------------------------------------------------------------|-------|-----------|-------------------------------|------------------|---------------------------------------------------------------------------------------------------------------------------------------------------------------------------------------------------------------------------------------------------------------------------------------------------------------------------------------------------------------------------------------------------------------------------------------------------------------------------------------------------------------------------------------------|
| 288 | <i>Premna barbata</i> Wall. ex Schauer                                   | Shrub | Lamiaceae | Gineri (Nepali)               | Leaves           | Juice is sprayed on fowl, cattle to remove fleas ("Sulsule") (69).                                                                                                                                                                                                                                                                                                                                                                                                                                                                          |
| 289 | <i>Prunus armeniaca</i> L.<br><i>*Prunus nepalensis</i> Hort. ex C. Koch | Tree  | Rosaceae  | Jsangali aaru (Nepali)        | Bark, Leaves     | Juice is applied to kill ectoparasites, leaves are poisonous to cattle (29).                                                                                                                                                                                                                                                                                                                                                                                                                                                                |
| 290 | <i>Prunus buergeriana</i> Miq.<br><i>*Prunus venosa</i> Koehne           | Tree  | Rosaceae  | Chari aare (Nepali)           | Leaves           | Leaves are poisonous, paste applied to treat swelling (29).                                                                                                                                                                                                                                                                                                                                                                                                                                                                                 |
| 291 | <i>Prunus cornuta</i> (Wall. ex Royle) Steud.                            | Tree  | Rosaceae  | Ban aaru (Nepali)             | Bark             | Used to treat livestock wounds (128).                                                                                                                                                                                                                                                                                                                                                                                                                                                                                                       |
| 292 | <i>Prunus davidiana</i> (Carrière) Franch.                               | Tree  | Rosaceae  |                               | Bark             | Juice is applied externally to kill ticks in cattle (3).                                                                                                                                                                                                                                                                                                                                                                                                                                                                                    |
| 293 | <i>Prunus persica</i> (L.) Stokes                                        | Tree  | Rosaceae  | Aaru (Nepali), Tokpo (Lepcha) | Leaves, New tips | Juice of leaf is put to take out any worms inside the wounds of animals (71). New tips are put in pathogens over the wounds of cattle (51). A paste with another plant is applied to broken and dislocated bones for animals, particularly goats (122). New leaf buds are taken and crushed to make juice. Then it is mixed with camphor and applied when endoparasites are seen. It is also applied to treat wound (26). Used to treat foot and mouth disease (63). Paste or juice from young shoot is used to treat cut and wounds (112). |
| 294 | <i>Psidium guajava</i> L.                                                | Tree  | Myrtaceae | Latam (Bantar), Amba (Nepali) | Leaves, Bark     | Tender leaf used to treat urinary problems (stopped urination) (40). Leaves paste applied locally to treat wounds of animals; raw or grinded bark mixed with animal                                                                                                                                                                                                                                                                                                                                                                         |

|     |                                                    |         |               |                                                                                                   |                              |                                                                                                                                                                                                                                                        |
|-----|----------------------------------------------------|---------|---------------|---------------------------------------------------------------------------------------------------|------------------------------|--------------------------------------------------------------------------------------------------------------------------------------------------------------------------------------------------------------------------------------------------------|
|     |                                                    |         |               |                                                                                                   |                              | feed is given to the animal to control diarrhea (116).                                                                                                                                                                                                 |
| 295 | <i>Punica granatum</i> L.                          | Tree    | Lythraceae    | Anar (Nepali)                                                                                     | Bark                         | Paste is given to domestic cattle to get relief from asthma (30).                                                                                                                                                                                      |
| 296 | <i>Pyrus pashia</i> Buch.-Ham.<br>ex D. Don        | Tree    | Rosaceae      | Mael (Nepali),<br>Ghorphal<br>(Magar)                                                             | Bark, fruit                  | Grinded fruits flour is given to cattle for more milking (88,119,126); the filtered juice of unripe fruit is used in cattle eye to cure white spot (48). Fruits used in constipation/ cataract (23). Plant juice used to treat eye troubles (111,117). |
| 297 | <i>Rauvolfia serpentina</i> (L.)<br>Benth. ex Kurz | Shrub   | Apocynaceae   | Sarpagandha<br>(Nepali)                                                                           | Roots                        | Root decoction was given to cattle to cure diarrhea (31,58). Root paste used to treat fever and stomachache (41).                                                                                                                                      |
| 298 | <i>Rhaphidophora decursiva</i><br>(Roxb.) Schott   | Climber | Araceae       | Kanchirno<br>(Nepali)                                                                             | Whole<br>plant               | Plant is given raw or mixed with flour and given to cattle to cure urinary problem (112).                                                                                                                                                              |
| 227 | <i>Rheum australe</i> D. Don                       | Herb    | Polygonaceae  | Padamchal<br>(Nepali)                                                                             | Roots,<br>Stem               | Root paste is applied on the injured or broken limbs for cattle (3,116). Root and stem used to treat sprain and fracture (23).                                                                                                                         |
| 300 | <i>Rhododendron<br/>anthopogon</i> D. Don          | Shrub   | Ericaceae     |                                                                                                   | Aerial parts                 | Plant odor is considered anti-poisoning (108).                                                                                                                                                                                                         |
| 301 | <i>Rhododendron<br/>campanulatum</i> D. Don        | Tree    | Ericaceae     | Chimal (Nepali)                                                                                   | Leaves                       | Poisonous to cattle (29,119).                                                                                                                                                                                                                          |
| 302 | <i>Ricinus communis</i> L.                         | Shrub   | Euphorbiaceae | Ander (Nepali);<br>Aril, Rend, Raine<br>(Tharu); Renu<br>(Magar), Iradam<br>(Satar);<br>Dandarobi | Seeds,<br>Leaves,<br>Flowers | Leaf powder is used to cure wounds for animal (22). Paste is made from the seeds and is applied over the swollen parts due to cold (4). The flowers are pounded with                                                                                   |

|     |                                                                                                          |         |              |                                                          |                                  |                                                                                                                                                                                                                                                                                                                                                          |
|-----|----------------------------------------------------------------------------------------------------------|---------|--------------|----------------------------------------------------------|----------------------------------|----------------------------------------------------------------------------------------------------------------------------------------------------------------------------------------------------------------------------------------------------------------------------------------------------------------------------------------------------------|
|     |                                                                                                          |         |              | (Tamang), Castor oil plant (English)                     |                                  | water and the paste obtained is applied to treat skin problems of cattle (104).                                                                                                                                                                                                                                                                          |
| 303 | <i>Rochelia zeylanica</i> (Vahl) Roem. & Schult.<br><br>* <i>Cynoglossum zeylanicum</i> Thumb. ex. Lehm. | Herb    | Boraginaceae | Bhere kuro (Nepali)                                      | Whole plant                      | Powder obtained from dried plant is blown to eye problem; paste of plant mixed with water and applied to cure skin scabies and wound (26).                                                                                                                                                                                                               |
| 304 | <i>Rubia manjith</i> Roxb. ex Fleming                                                                    | Climber | Rubiaceae    | Majitho (Nepali), Tiru (Tamang), Indian madder (English) | Whole plant, Stem                | Useful in inflammation of cattle (128). It is also given to cattle to expel placenta (3). Stem used in liver disease (23).                                                                                                                                                                                                                               |
| 305 | <i>Rubia wallichiana</i> Decne.                                                                          | Climber | Rubiaceae    |                                                          | Stem                             | Useful in inflammation of cattle (128).                                                                                                                                                                                                                                                                                                                  |
| 306 | <i>Rubus ellipticus</i> Sm.                                                                              | Shrub   | Rosaceae     | Aiselu                                                   | Leaves                           | Leaves are crushed to make a paste and applied in the wound area (26).                                                                                                                                                                                                                                                                                   |
| 307 | <i>Rumex nepalensis</i> Spreng.                                                                          | Herb    | Polygonaceae | Halhale (Nepali), Hali (Gurung), Sheep sorrel (English)  | Roots, Young shoots, whole plant | Used as antidote for food poisoning (22). Root paste is applied over the dislocated bone and is also applied with frame of bamboo stick at the bone fracture segment until relief (4). Plant is boiled to treat diarrhea of a goat (29). Young shoots are given to cattle for energy (116). Root decoction is used to treat diarrhea of the cattle (31). |
| 308 | <i>Saccharum officinarum</i> L.                                                                          | Herb    | Poaceae      | Ukhu (Nepali)                                            | Stem, Leaves                     | Stem is crushed to obtain juice, boiled, and fed by mixing with cornflour to increase milk production; leaf is given as feed to remove placenta (26).                                                                                                                                                                                                    |

|     |                                                                                        |       |               |                                                                                                              |              |                                                                                                                                                                                                                                                                                                                                                                                                                         |
|-----|----------------------------------------------------------------------------------------|-------|---------------|--------------------------------------------------------------------------------------------------------------|--------------|-------------------------------------------------------------------------------------------------------------------------------------------------------------------------------------------------------------------------------------------------------------------------------------------------------------------------------------------------------------------------------------------------------------------------|
| 309 | <i>Saccharum spontaneum</i> L.                                                         | Herb  | Poaceae       | Kaans (Nepali)                                                                                               | Roots        | Paste is directly applied to remove helminths of cattle (75).                                                                                                                                                                                                                                                                                                                                                           |
| 310 | <i>Salix denticulata</i> Andersson                                                     | Tree  | Salicaceae    |                                                                                                              | Leaves       | Poisonous to sheep (29).                                                                                                                                                                                                                                                                                                                                                                                                |
| 311 | <i>Salvia plebeia</i> R. Br.                                                           | Herb  | Lamiaceae     |                                                                                                              | Leaves       | Rubbed externally on feet to remove lice of cattle (22).                                                                                                                                                                                                                                                                                                                                                                |
| 312 | <i>Sapindus mukorossi</i> Gaertn.                                                      | Tree  | Sapindaceae   | Ritha (Nepali)                                                                                               | Fruit        | Fruit with its covering are cooked with cornflour and water to cure urinary problem (26).                                                                                                                                                                                                                                                                                                                               |
| 313 | <i>Sarcococca coriacea</i> (Hook.) Sweet<br><br>* <i>Sarcococca pruniformis</i> Lindl. | Shrub | Buxaceae      | Phitphiya (Nepali),<br>Gherpati (Tamang)                                                                     | Seeds        | Powdered seeds are mixed with corn flour to feed orally to treat the stomachache (4).                                                                                                                                                                                                                                                                                                                                   |
| 314 | <i>Saurauia napaulensis</i> DC.                                                        | Tree  | Actinidiaceae | Gogan (Nepali)                                                                                               | Leaves       | Used to cure cattle dysentery and gastric (113).                                                                                                                                                                                                                                                                                                                                                                        |
| 315 | <i>Schefflera venulosa</i> (Wight & Arn.) Harms                                        | Shrub | Araliaceae    |                                                                                                              | Leaves       | Given as feed to treat the conjunctivitis of cattle (31,89).                                                                                                                                                                                                                                                                                                                                                            |
| 316 | <i>Schima wallichii</i> (DC.) Korth.                                                   | Tree  | Theaceae      | Chilaune (Nepali); Gwe chhasima, Khyu si (Gurung); Ghyansing (Magar), Chyangsi (Chepang); Sakriphal (Satar); | Bark, Leaves | Given orally to cattle suffering from Taeniasis (91); Bark juice with other ingredients is given to relieve stomach disorders of cattle (89), given to animals infested with liver flukes (86) and also as an anthelmintic (4,31,71). Pounded bark is given to animals to treat liver fluke (87). Bark paste given to animal to treat namle disease (100). Powder used to treat stomach disorders and liver fluke (28). |

|     |                                                                                                         |          |                |                        |               |                                                                                                                                                                                                                                                                                                                  |
|-----|---------------------------------------------------------------------------------------------------------|----------|----------------|------------------------|---------------|------------------------------------------------------------------------------------------------------------------------------------------------------------------------------------------------------------------------------------------------------------------------------------------------------------------|
|     |                                                                                                         |          |                | Kyasing<br>(Tamang)    |               | Bark of this plant and <i>Oroxylum indicum</i> are dried, then ground to obtain powder, and given orally to cure diarrhea. Given to cure endoparasite (26). Powder is medicinal (108). Bark juice used to treat cough (29). Decoction of bark and leaves is given to get rid of intestinal worms of cattle (30). |
| 317 | <i>Scindapsus officinalis</i><br>(Roxb.) Schott                                                         | Herb     | Araceae        | Kanchirno<br>(Nepali)  | Fruits        | Given to treat stomach worms (31,62). Boiled and dropped to treat eye disease, given to treat diarrhea and also put in wound to remove maggot (29).                                                                                                                                                              |
| 318 | <i>Scoparia dulcis</i> L.                                                                               | Herb     | Plantaginaceae | Chini jahr<br>(Nepali) | Stem          | Stem is crushed, and the paste is applied to the swelling area (26).                                                                                                                                                                                                                                             |
| 319 | <i>Scurrula parasitica</i> L.                                                                           | Parasite | Loranthaceae   | Jokhare (Nepali)       | Tender shoots | Given in loss of appetite and vomiting to livestock (101).                                                                                                                                                                                                                                                       |
| 320 | <i>Scutellaria scandens</i> D.<br>Don                                                                   | Parasite | Lamiaceae      |                        | Roots         | Juice is given to domestic animals to prevent miscarriage (86).                                                                                                                                                                                                                                                  |
| 321 | <i>Semecarpus anacardium</i><br>L. fil.                                                                 | Tree     | Anacardiaceae  |                        | Fruits        | Used to treat cut, paste with <i>Allium sativum</i> is used to treat tail cut (27). Fruit is ground with mustard oil and applied to wound (26).                                                                                                                                                                  |
| 322 | <i>Senegalia catechu</i> (L.f.)<br>P.J.H.Hurter & Mabb.<br><br>* <i>Acacia catechu</i> (L.f.)<br>Willd. | Tree     | Fabaceae       | Khair (Nepali)         | Bark          | Bark is given to elephant to check intestinal worms, diarrhea and dysentery; bark decoction is given to treat diarrhea and dysentery to other domestic animals (30).                                                                                                                                             |

|     |                                                                                |       |             |                                                                                                                  |               |                                                                                                                                                                                                                                                                                                                                                                                                                                                                                                                                                     |
|-----|--------------------------------------------------------------------------------|-------|-------------|------------------------------------------------------------------------------------------------------------------|---------------|-----------------------------------------------------------------------------------------------------------------------------------------------------------------------------------------------------------------------------------------------------------------------------------------------------------------------------------------------------------------------------------------------------------------------------------------------------------------------------------------------------------------------------------------------------|
| 323 | <i>Senegalia pennata</i> (L.) Maslin<br><br>* <i>Acacia pennata</i> (L.) Willd | Tree  | Fabaceae    | Arari (Tharu)                                                                                                    | Bark          | Juice is fed to domestic animals to relieve sprain and muscular swellings (18).                                                                                                                                                                                                                                                                                                                                                                                                                                                                     |
| 324 | <i>Senna tora</i> (L.) Roxb.<br><br>* <i>Cassia tora</i> L.                    | Shrub | Fabaceae    | Tapre ,Chakon, Tapre,Sanotapre (Nepali); Ayadham, Chakwad (Tharu), Chakramardha (Sanskrit); Sickle pod (English) | Seeds, Leaves | Used in falling of hair of cattle (58) and fever (41,52,96). Seed powder/paste is taken as potential anthelmintic for cattle (102). Leaf powder is rubbed onto parts of cattle affected by falling of hair (58). Seed powder is given to cattle as an anthelmintic, for immature cattle, sheep and goats, the dose is lowered proportionately (82). Plant used as veterinary medicine (39). Squeezed leaves rubbed on body of animal to check the falling of hairs (29). Roasted seeds are given to animals for a month to fatten the animals (30). |
| 325 | <i>Sesamum indicum</i> subsp. <i>indicum</i>                                   | Herb  | Pedaliaceae |                                                                                                                  | Seeds         | Seeds oil used to treat external wound (23). Powder is obtained from seeds of this plant, <i>Trachyspermum ammi</i> and <i>Myristica fragrans</i> and then fed to cure chronic cough and constipation. <i>Sesamum indicum</i> , <i>Trachyspermum ammi</i> and <i>Linum usitatissimum</i> are fried and crushed to make powder and fed to cure mastitis and increase milk production (26).                                                                                                                                                           |
| 326 | <i>Shangwua denticulata</i> (DC.) Raab-Straube & Yu J. Wang                    | Herb  | Asteraceae  | Bhukur (Nepali), Jhya (Tamang)                                                                                   | Leaves        | Leaf extract is given to control the fever; the plant is tied around the tail to stimulate the milk secretion and is practiced to Naks in high altitude (4).                                                                                                                                                                                                                                                                                                                                                                                        |



|     |                                                |      |                  |                                                                      |                   |                                                                                                                                                                                                |
|-----|------------------------------------------------|------|------------------|----------------------------------------------------------------------|-------------------|------------------------------------------------------------------------------------------------------------------------------------------------------------------------------------------------|
| 327 | <i>Shorea robusta</i> Gaertn.                  | Tree | Dipterocarpaceae | Saal (Nepali), Sakhua                                                | Resin, Stem, Bark | During hoof infection in cattle resin is mixed with oil and applied on the hoof daily (102). Fresh decoction of stem bark is given to check diarrhea (30).                                     |
| 328 | <i>Sida acuta</i> Burm. f.                     | Herb | Malvaceae        | Balu, Kuro (Nepali)                                                  | Roots             | Used as buti in the sickness of cattle (69).                                                                                                                                                   |
| 329 | <i>Sida cordata</i> (Burm. fil.) Borss. Waalk. | Herb | Malvaceae        | Kuro (Nepali)                                                        | Whole plant       | Plant paste is out in mouth of cattle if the milching is suddenly stopped (29).                                                                                                                |
| 330 | <i>Sida rhombifolia</i> L.                     | Herb | Malvaceae        | Balu jhar; Thulo balu, Bishkapre, Sano chilya, Sano khareto (Nepali) | Leaves            | Paste used in breast encouragement (69).                                                                                                                                                       |
| 331 | <i>Sigesbeckia orientalis</i> L.               | Herb | Asteraceae       |                                                                      | Whole plant       | Plant used as veterinary medicine (39).                                                                                                                                                        |
| 332 | <i>Solanum lycopersicum</i> L.                 | Herb | Solanaceae       | Tamatar (Nepali)                                                     | Fruit             | Fruit is crushed, and then the juice is applied to the burn area; fruit is directly fed to livestock to cure endoparasite; fruit juice is applied to cure mastitis (26).                       |
| 333 | <i>Solanum melongena</i> L.                    | Herb | Solanaceae       |                                                                      | Fruit, Leaves     | Roasted fruit paste with mustard oil is used to treat shoulder pain (27). The fruit is roasted and fed to animal to cure diarrhea, new leaves are crushed and fed to remove the placenta (26). |
| 334 | <i>Solanum tuberosum</i> L.                    | Herb | Solanaceae       |                                                                      | Tubers            | Paste is applied to treat burnt wound (27). Tuber is cut and rubbed externally on burns twice a day (26).                                                                                      |

|     |                                                                                                            |         |                 |                                         |                                  |                                                                                                                                                                                                                                                                                                                                                                                                                                                                                 |
|-----|------------------------------------------------------------------------------------------------------------|---------|-----------------|-----------------------------------------|----------------------------------|---------------------------------------------------------------------------------------------------------------------------------------------------------------------------------------------------------------------------------------------------------------------------------------------------------------------------------------------------------------------------------------------------------------------------------------------------------------------------------|
| 335 | <i>Solanum virginianum</i> L.                                                                              | Herb    | Solanaceae      | Rengani                                 | Whole plant,<br>Roots,<br>Fruits | Whole plant including roots is smoked and given to elephant to check diarrhea and intestinal worms. Fruit is eaten raw for relief from cough (30).                                                                                                                                                                                                                                                                                                                              |
| 336 | <i>Solena amplexicaulis</i> (Lam.) Gandhi ex Saldanha & Nicolson<br><br>* <i>Solena heterophylla</i> Lour. | Climber | Cucurbitaceae   | Ban kakri, Golkakri, Bankankro (Nepali) | Whole plant,<br>Roots            | Whole plant is used to increase milk production in cattle (22,31); proper development of foetus (31); supplied as feed to she-buffalo or cow to improve lactation (89). Plant used as veterinary medicine (39). Paste used to treat mastitis (28). The paste prepared from the root is applied to cure mastitis; The whole plant is considered a nutritious feed, and also used to increase milk production (26). Root juice is given to kill intestinal worms in cattle (116). |
| 337 | <i>Spermacoce alata</i> Aubl.<br><br>* <i>Spermacoce latifolia</i> Aubl.                                   | Herb    | Rubiaceae       | Paundhi (Nepali)                        | Whole plant                      | Juice applied to heal fractured bone of cattle (31,58).                                                                                                                                                                                                                                                                                                                                                                                                                         |
| 338 | <i>Spermadictyon suaveolens</i> Roxb.                                                                      | Shrub   | Rubiaceae       | Ban chaap (Nepali)                      | Bark                             | Paste is given to treat cough in animals (86).                                                                                                                                                                                                                                                                                                                                                                                                                                  |
| 339 | <i>Sphaeranthus senegalensis</i> DC.                                                                       | Herb    | Asteraceae      | Bonsupari (Nepali), Ganhuwa (Danuwar)   | Flowers                          | Flower heads fed to animals to treat ear troubles (46).                                                                                                                                                                                                                                                                                                                                                                                                                         |
| 340 | <i>Stellaria monosperma</i> Buch.-Ham. ex D. Don                                                           | Herb    | Caryophyllaceae |                                         | Roots                            | Powder is given in case of diarrhea (31).                                                                                                                                                                                                                                                                                                                                                                                                                                       |

|     |                                                                                                                 |         |                |                                                             |                      |                                                                                                                                                                                                                 |
|-----|-----------------------------------------------------------------------------------------------------------------|---------|----------------|-------------------------------------------------------------|----------------------|-----------------------------------------------------------------------------------------------------------------------------------------------------------------------------------------------------------------|
| 341 | <i>Stephania glandulifera</i> Miers                                                                             | Climber | Menispermaceae | Biral gano, Batulpate, Batule (Nepali); Gudargano (Chepang) | Roots, Whole plant   | Used as veterinary medicine (69). Peeled root mixed with corn flour is given to cattle as tonic (70). Juice from whole plant is used to treat stomach disorder (28). Roots given to treat diarrhea (29,31,108). |
| 342 | <i>Stephania gracilentia</i> Miers                                                                              | Climber | Menispermaceae | Biralkano (Nepali)                                          | Roots                | Used to treat swelling (23).                                                                                                                                                                                    |
| 343 | <i>Stephania japonica</i> (Thunb.) Miers                                                                        | Climber | Menispermaceae | Muklak (Nepali)                                             | Roots                | Root tubers given to ox as feed supplement (74).                                                                                                                                                                |
| 344 | <i>Streblus asper</i> Lour.                                                                                     | Tree    | Moraceae       | Khaksi (Nepali), Shihora                                    | Latex, Leaves, twigs | Applied on the eye of the cattle during eye problem (19). Leaves paste used to treat burnt wound (27). Twigs are burnt to ash and used for healing wounds (30).                                                 |
| 345 | <i>Strobilanthes tomentosa</i> (Wall. ex Nees) J. R. I. Wood<br><br>* <i>Aechmanthera gossypina</i> (Nees) Nees | Shrub   | Acanthaceae    | Kangaraito phul (Nepali)                                    | Roots                | Paste is applied to guard against internal injuries (31).                                                                                                                                                       |
| 346 | <i>Swertia chirayita</i> (Roxb. ex Fleming) Karsten                                                             | Herb    | Gentianaceae   | Chirayito (Nepali)                                          | Roots, Stems         | Root/stem used as anthelmintic (23). Useful in throat pain (128).                                                                                                                                               |
| 347 | <i>Swertia ciliata</i> (D. Don ex G.Don) B.L. Burt.                                                             | Herb    | Gentianaceae   | Chirayito (Nepali), Hoba (Tamang)                           | Whole plant          | Juice is given to yaks and sheep to relieve from fever (4).                                                                                                                                                     |
| 348 | <i>Symplocos paniculata</i> (Thunb.) Miq.                                                                       | Tree    | Symplocaceae   | Lodh (Nepali), Syungen (Tamang)                             | Leaves               | Given to cattle to enhance the secretion of milk (4).                                                                                                                                                           |

|     |                                                                                                 |      |              |                                           |                            |                                                                                                                                                                                               |
|-----|-------------------------------------------------------------------------------------------------|------|--------------|-------------------------------------------|----------------------------|-----------------------------------------------------------------------------------------------------------------------------------------------------------------------------------------------|
| 349 | <i>Syzygium cumini</i> (L.)<br>Skeels                                                           | Tree | Myrtaceae    | Jamun (Nepali)                            | Bark                       | Juice given to treat diarrhea (29).                                                                                                                                                           |
| 350 | <i>Syzygium nervosum</i> DC.<br>* <i>Cleistocalyx operculatus</i> (Roxb.) Merr. & Perry         | Tree | Myrtaceae    | Kyamuna (Nepali)                          | Bark                       | Plant used as veterinary medicine (39). Bark juice is given to cattle to treat muscular swellings (31).                                                                                       |
| 351 | <i>Tagetes erecta</i> L.<br>* <i>Tagetes patula</i> L.                                          | Herb | Asteraceae   |                                           | Roots                      | Fresh roots are ground and fed to treat urinary problem (26).                                                                                                                                 |
| 352 | <i>Tamarindus indica</i> L.                                                                     | Tree | Fabaceae     | Imli, Titri (Nepali)                      | Bark, Leaves               | Infusion of bark along with ingredients is given to cure flatulence of cattle (66). Decoction of mature leaves is applied locally to reduce pain from wound or beating (30).                  |
| 353 | <i>Taraxacum officinale</i> Wigg.                                                               | Herb | Asteraceae   | Tukiphool (Nepali), Bhutil mendo (Tamang) | Roots, leaves, whole plant | Paste of the plant is applied over the dislocated bones and also bound in fractured bones and fixed with bamboo sticks instead of plaster until relief. Root and leaf used for the cough (4). |
| 354 | <i>Taxus wallichiana</i> Zucc.<br>* <i>Taxus baccata</i> subsp <i>wallichiana</i> (Zucc.) Pilg. | Tree | Taxaceae     | Lauth salla (Nepali)                      | Leaves                     | Leaves are poisonous to cattle (29).                                                                                                                                                          |
| 355 | <i>Tephrosia purpurea</i> (L.) Pers.                                                            | Herb | Fabaceae     | Kande sakinu (Nepali)                     | Whole plant                | Paste applied for wounds and boils (29).                                                                                                                                                      |
| 356 | <i>Terminalia alata</i> B. Heyne ex Roth                                                        | Tree | Combretaceae | Saj (Nepali)                              | Resin                      | Applied to treat swelling caused by injury (62).                                                                                                                                              |

|     |                                                                                                                       |       |               |                                        |                       |                                                                                                                                                                                  |
|-----|-----------------------------------------------------------------------------------------------------------------------|-------|---------------|----------------------------------------|-----------------------|----------------------------------------------------------------------------------------------------------------------------------------------------------------------------------|
| 357 | <i>Terminalia bellirica</i><br>(Gaertn.) Roxb.                                                                        | Tree  | Combretaceae  | Barro (Nepali),<br>Bahera              | Fruits                | Fresh fruit is given orally to treat diarrhea (26). Fruit is used to control diarrhea for the domestic cattles. Dry fruit powder is given to cattle to improve indigestion (30). |
| 358 | <i>Terminalia chebula</i> Retz.                                                                                       | Tree  | Combretaceae  | Harro (Nepali)                         | Fruit                 | Fruit is used to control diarrhea for the domestic cattles. Dry fruit powder is given to cattle to improve indigestion (30).                                                     |
| 359 | <i>Tetradium fraxinifolium</i><br>(Hook. fil.) T. G. Hartley<br><br>* <i>Evodia fraxiniflora</i> (D.<br>Don) Hook. f. | Tree  | Rutaceae      |                                        | Fruits                | Paste and decoction used to treat fever, cough and cold, fatigue, stomach pain, dyspepsia (105).                                                                                 |
| 360 | <i>Tetrataenium nepalense</i><br>(D. Don) Manden.<br><br>* <i>Heracleum nepalense</i> D.<br>Don                       | Herb  | Apiaceae      |                                        | Whole<br>plant, Fruit | Whole plant is nutritious fodder to increase the milk in cattle, given for better lactation (3). Paste used to treat stomach problem and diarrhea (105).                         |
| 361 | <i>Tetrataenium wallichii</i><br>(DC.) Manden. DC.                                                                    | Herb  | Apiaceae      |                                        | Whole<br>plant        | Given to cattle for better lactation (3).                                                                                                                                        |
| 362 | <i>Thalictrum chelidonii</i> DC.                                                                                      | Herb  | Ranunculaceae | Dampate<br>(Nepali), Urmén<br>(Tamang) | Roots                 | Juice is given to cows to control the fever (4).                                                                                                                                 |
| 363 | <i>Thalictrum foliolosum</i><br>DC.                                                                                   | Herb  | Ranunculaceae |                                        | Roots,<br>Leaves      | Paste of roots and leaves is given to expel intestinal worms in cattle (2,82).                                                                                                   |
| 364 | <i>Thysanolaena latifolia</i><br>(Roxb. ex Hornem.)<br>Honda<br><br>* <i>Thysanolaena maxima</i><br>(Roxb.) Kuntz     | Shrub | Poaceae       | Amriso (Nepali)                        | Leaves                | Indigestion and cough problems in cattle (59). Leaves as a feed are given to remove placenta (26).                                                                               |

|     |                                                                                            |         |                |                                                                                      |             |                                                                                                                                                                                                                                                                                                                                                                                                                     |
|-----|--------------------------------------------------------------------------------------------|---------|----------------|--------------------------------------------------------------------------------------|-------------|---------------------------------------------------------------------------------------------------------------------------------------------------------------------------------------------------------------------------------------------------------------------------------------------------------------------------------------------------------------------------------------------------------------------|
| 365 | <i>Tinospora cordifolia</i> (Willd.) Miers                                                 | Climber | Menispermaceae | Gurjegana (Magar), Gurjo (Nepali); Gurju (Tamang); Gurj, Giloy (Tharu); Bhrun (Raji) | Stem        | Given orally to cattle to cure sterility (91). Piece of stem is fed to cattle for their good health and lactation (45). Stem juice given in appetite loss (27). Stem is made into small pieces, then boiled with water and fed to cure chronic cough and constipation, the powder is obtained from dried stem and given orally with water to treat diarrhea (26). Pieces are given in case of cough of cattle (31). |
| 366 | <i>Tinospora sinensis</i> (Lour.) Miers                                                    | Climber | Menispermaceae | Gurujlati (Bantar), Gurjo (Nepali)                                                   | Whole plant | Plant used to treat tiredness (40). Tonic to cattle (69). Plant is galactogogue and given to cattle to increase lactation and to treat diarrhea and dysentery (68).                                                                                                                                                                                                                                                 |
| 367 | <i>Toxicodendron wallichii</i> (Hook. fil.) Kuntze<br><br>* <i>Rhus wallichii</i> Hook. f. | Tree    | Anacardiaceae  | Bhakimlo (Nepali)                                                                    | Fruits      | Used to treat constipation (23).                                                                                                                                                                                                                                                                                                                                                                                    |
| 368 | <i>Trachyspermum ammi</i> (L.) Sprague                                                     | Herb    | Apiaceae       |                                                                                      | Seeds       | Powder given in flatulence and constipation (27). Given to animals by mixing with cornflour to cure constipation and increase milk production (26).                                                                                                                                                                                                                                                                 |
| 369 | <i>Trichosanthes cucumerina</i> L.                                                         | Climber | Cucurbitaceae  | Chichindo (Nepali)                                                                   | Seeds       | Dried seeds are crushed to make powder and fed by mixing with turmeric to cure endoparasite (26). Fruit is fed raw to treat mastitis and removing the placenta (26).                                                                                                                                                                                                                                                |
| 370 | <i>Trichosanthes cucumerina</i> subsp. <i>anguina</i> (L.) Greb.                           | Climber | Cucurbitaceae  | Chichindo (Nepali)                                                                   | Fruits      | Powder used to treat mastitis (28).                                                                                                                                                                                                                                                                                                                                                                                 |

|     |                                           |         |               |                                          |               |                                                                                                                                                                                                              |
|-----|-------------------------------------------|---------|---------------|------------------------------------------|---------------|--------------------------------------------------------------------------------------------------------------------------------------------------------------------------------------------------------------|
|     | <i>*Trichosanthes anguina</i> L.          |         |               |                                          |               |                                                                                                                                                                                                              |
| 371 | <i>Trichosanthes tricuspidata</i> Lour.   | Climber | Cucurbitaceae | Indreni, Inddrayani (Magar)              | Fruits, roots | Used in boils, abdominal pain, gastritis of cattle (99,103), Fruit is considered as digestive and applied in paralysis, gastric and tila of cattle (128).                                                    |
| 372 | <i>Tridax procumbens</i> L.               | Herb    | Asteraceae    | Thikuri (Danuwar)                        | Whole plant   | Mixed with animal feed to treat hemorrhagic septicemia of animals (46).                                                                                                                                      |
| 373 | <i>Trifolium repens</i> L.                | Herb    | Fabaceae      |                                          | Whole plant   | Given to cattle for better lactation (3).                                                                                                                                                                    |
| 374 | <i>Trigonella foenum-graecum</i> L.       | Herb    | Fabaceae      | Methi                                    | Seeds         | Soaked seeds are mixed with cornflour meal, and given orally to cure chronic cough and fever; <i>Trigonella foenum-graecum</i> and <i>Zingiber officinale</i> are mixed and fed to cure joint swelling (26). |
| 375 | <i>Trillium govanianum</i> Wall. ex D.Don | Herb    | Liliaceae     | Satuwa (Nepali)                          | Roots         | Used in external wound/poisoning (plant poisons) (23).                                                                                                                                                       |
| 376 | <i>Uraria lagopus</i> DC.                 | Herb    | Fabaceae      | Sano bhatte (Nepali), Tewalapte (Tamang) | Roots         | Root crushed with turmeric is applied over dislocated bones and bound in fractured bone, bandaged and wrapped with bamboo sticks for one month; it is usually practiced to the cows (4).                     |
| 377 | <i>Urtica ardens</i> Link                 | Herb    | Urticaceae    | Ghariya sisnu (Nepali), Kultuk (Lepcha)  | Root          | Paste is applied in sprain (112).                                                                                                                                                                            |

|     |                                                                                                                                                                |      |                  |                                                     |                            |                                                                                                                                                                                                                                                        |
|-----|----------------------------------------------------------------------------------------------------------------------------------------------------------------|------|------------------|-----------------------------------------------------|----------------------------|--------------------------------------------------------------------------------------------------------------------------------------------------------------------------------------------------------------------------------------------------------|
| 378 | <i>Urtica dioica</i> L.                                                                                                                                        | Herb | Urticaceae       | Sisnu (Nepali),<br>Polo (Tamang)                    | Tender<br>parts,<br>Fruits | Given to increase lactation (4,76,101).<br>Leaf is boiled, and water is fed to an<br>animal to cure mastitis and urinary<br>problem (26). Fruit paste used to treat<br>sprain in cattle (63).                                                          |
| 379 | <i>Vachellia nilotica</i> subsp.<br><i>indica</i> (Benth.) Kyal. &<br>Boatwr.<br><br>* <i>Acacia nilotica</i> subsp.<br><i>indica</i> (L.) Willd. ex<br>Delile | Tree | Fabaceae         | Babul (Nepali),<br>Babur (Batar)                    | Bark                       | Bark used in urinary problem (40).                                                                                                                                                                                                                     |
| 380 | <i>Verbascum thapsus</i> L.                                                                                                                                    | Herb | Scrophulariaceae | Bandar puchhre<br>(Nepali),<br>Pangjalu<br>(Tamang) | Roots                      | Roots of the plant are mixed with the roots<br>of <i>Urtica dioica</i> and are prepared in the<br>form of paste and applied over dislocated<br>bones. Paste of the root is also applied on<br>the muscular swelling in cases of phantom<br>effect (4). |
| 381 | <i>Vicia sativa</i> L.                                                                                                                                         | Herb | Fabaceae         | Narkat (Nepali),<br>Nakta (Batar)                   | Whole<br>plant             | Whole plant given for lactation (40).                                                                                                                                                                                                                  |
| 382 | <i>Vicia sativa</i> subsp. <i>nigra</i><br>(L.) Ehrh.<br><br>* <i>Vicia angustifolia</i> L.                                                                    | Herb | Fabaceae         |                                                     | Whole<br>plant             | Plant is poisonous to cattle (67).                                                                                                                                                                                                                     |
| 383 | <i>Vigna mungo</i> (L.) Hepper                                                                                                                                 | Herb | Fabaceae         | Maas (Nepali)                                       | Whole<br>plant             | Preparation applied on broken and<br>dislocated bones of animals supported by<br>wooden frame, tied with either a rope or a<br>cloth (122).                                                                                                            |
| 384 | <i>Vigna<br/>radiata</i> (L.) R.Wilczek                                                                                                                        | Herb | Fabaceae         |                                                     | Seeds                      | Seed flour used in fracture of limbs/foot<br>and mouth disease (23).                                                                                                                                                                                   |



|     |                                       |          |            |                      |                         |                                                                                                                                                                                                                                                                                                                                                                 |
|-----|---------------------------------------|----------|------------|----------------------|-------------------------|-----------------------------------------------------------------------------------------------------------------------------------------------------------------------------------------------------------------------------------------------------------------------------------------------------------------------------------------------------------------|
|     | <i>*Phaseolus radiatus</i> Linn.      |          |            |                      |                         |                                                                                                                                                                                                                                                                                                                                                                 |
| 385 | <i>Viscum album</i> L.                | Parasite | Viscaceae  | Ainjeru (Nepali)     | Whole plant, Bark, Stem | Plant paste is applied to treat dislocated bones and wounds in cattle (20,70).Used to treat various diseases (80). The stem is crushed and paste is applied to the swelling area. It can also be fed by mixing with ghee and honey (26). Bark paste is given in case of muscular swellings and is also used to treat boils and wounds (31).                     |
| 386 | <i>Vitex negundo</i> L.               | Shrub    | Lamiaceae  | Senwar               | Leaves, Seeds           | Decoction used to treat joint swelling (27). Boiled extract of the leaf is applied on scabies and other skin infections in animals (26). Decoction of leaves is given to cattle to get relief from rheumatism. Paste of tender shoots is applied locally to get relief from scorpion bite (30). Crushed seeds are given to cure cough and cold of animals (31). |
| 387 | <i>Woodfordia fruticosa</i> (L.) Kurz | Shrub    | Lythraceae | Dhayero (Nepali)     | Flowers                 | Plant used as veterinary medicine (39).                                                                                                                                                                                                                                                                                                                         |
| 388 | <i>Xanthium strumarium</i> L.         | Herb     | Asteraceae | Bhende kuro (Nepali) | Leaves                  | Paste applied to treat wound of a goat, sheep and other small animals (29).                                                                                                                                                                                                                                                                                     |
| 389 | <i>Zanthoxylum armatum</i> DC.        | Shrub    | Rutaceae   | Timur (Nepali)       | Fruits                  | Fruits used to expel leeches from nostrils (23).                                                                                                                                                                                                                                                                                                                |
| 390 | <i>Zanthoxylum oxyphyllum</i> Edgew.  | Shrub    | Rutaceae   |                      | Fruits                  | Used to kill lice and teaks (80).                                                                                                                                                                                                                                                                                                                               |
| 391 | <i>Zea mays</i> L.                    | Herb     | Poaceae    | Makai (Nepali)       | Smut                    | Head smut infected corn is crushed by mixing with lemon juice and fed to treat diarrhea; Maize flour is made from corn                                                                                                                                                                                                                                          |

|     |                                   |      |               |                 |          |                                                                                                                                                                                                                                                                                                                                                                                                                                                 |
|-----|-----------------------------------|------|---------------|-----------------|----------|-------------------------------------------------------------------------------------------------------------------------------------------------------------------------------------------------------------------------------------------------------------------------------------------------------------------------------------------------------------------------------------------------------------------------------------------------|
|     |                                   |      |               |                 |          | seed and boiled with salt and water to increase milk production (26). Corn flour is mixed with <i>Asparagus racemosus</i> root juice and the mixture is given to buffaloes to stimulate milk production (104).                                                                                                                                                                                                                                  |
| 392 | <i>Zingiber officinale</i> Roscoe | Herb | Zingiberaceae | Kachur (Nepali) | Rhizomes | Foot and mouth diseases and other communicable diseases (80). Used as appetizer (23). Rhizome paste of this plant with <i>Piper nigrum</i> and <i>Acorus calamus</i> is given in fever (27). Raw rhizome is crushed and given to cure diarrhea, mastitis. It is crushed with <i>Trigonella foenum-graecum</i> to treat joint swelling; Raw rhizome is ground with camphor to treat wounds (26). Rhizome paste is given in cough and fever (29). |
| 393 | <i>Ziziphus mauritiana</i> Lam.   | Tree | Rhamnaceae    | Bayer (Nepali)  | Bark     | Decoction used to treat wounds on shoulder of an ox or a buffalo, caused by yoke (29).                                                                                                                                                                                                                                                                                                                                                          |
